# Supplementary material
Source: PubMed Central journal article supplement (PMC6014557)
Supplement: DB170914SupplementaryData1.pdf [file DB170914SupplementaryData1.pdf]

SUPPLEMENTARY DATA

**Supplementary Table S1.** Table of phenotypic characteristics

www.well.ox.ac.uk/~nvanzuy/Onlinesupp.S1Table1.xlsx

**Supplementary Table S2.** Narrow sense ('chip') heritability of diabetic kidney disease phenotypes in subjects with type 2 diabetes estimated in the GoDARTS study

| Phenotype*                           | Cases | Controls | h <sup>2</sup> | SE   | pval                 |
|--------------------------------------|-------|----------|----------------|------|----------------------|
| Chronic kidney disease               | 1,997 | 2,066    | 0.12           | 0.05 | 8.2×10 <sup>-3</sup> |
| All diabetic kidney disease          | 1,744 | 1,496    | 0.08           | 0.07 | 0.12                 |
| Estimated glomerular filtration rate |       | 6,335    | 0.07           | 0.03 | 9.8×10 <sup>-3</sup> |

\*All cases are compared to subjects with type 2 diabetes and normoalbuminuria or an estimated glomerular filtration rate >60 mL/min/1.73m<sup>2</sup> unless otherwise stated.

**Supplementary Table S3.** Study characteristics for studies included in the discovery meta-analysis of the primary 'all diabetic kidney disease' phenotype

| Diabetes | Cohort                       | Cases/controls | Age of onset of diabetes (cases/controls) | Age (cases/controls)  | %Males (cases/controls) | BMI (cases/controls) | HbA1c (cases/controls) | Duration of diabetes (cases/controls) |
|----------|------------------------------|----------------|-------------------------------------------|-----------------------|-------------------------|----------------------|------------------------|---------------------------------------|
| 2        | SDR                          | 1,250/580      | 54.5(12.6)/51.7(10.8)                     | 65.5(11.7)/67.8(10.5) | 65/52                   | 30.2(5.3)/28.9(5.1)  | 7.2(1.2)/6.9(1.0)      | 10.9(8.70)/16.1(6.0)                  |
| 2        | BENEDICT study phase A and B | 188/165        | 53.4(8.6)/49.3(8.4)                       | 66.3(11.0)/70.1(7.3)  | 177/58                  | 29.38(4.8)/27.8(4.1) | 6.0(1.4)/5.8(1.4)      | 12.(9.5)/20.8(6.0)                    |
| 2        | STENO                        | 163/131        | 46.1(9.2)/45.9(8.9)                       | 61.2(7.5)/63.0(8.3)   | 60/62                   | 29.8(5.2)/27.3(4.5)  | 9.1(1.7)/8.8(1.3)      | 15.3(7.1)/17.1(5.9)                   |
| 2        | GoDARTS 1*                   | 885/816        | 68.6(9.1)/66.2(8.8)                       | 58.9(12.3)/54.0(12.1) | 53/52                   | 31.0(5.5)/31.0(5.4)  | 7.6(1.4)/7.5(1.3)      | 14.1(8.1)/16.5(6.8)                   |
| 2        | GoDARTS 2*                   | 859/680        | 67.9(11.6)/66.2(10.8)                     | 72.1(11.2)/70.1(10.7) | 60/60                   | 31.5(6.1)/31.2(6.1)  | 7.5(1.5)/7.5(1.3)      | 11.4(6.9)/15.5(5.5)                   |

\*GoDARTS was typed on two genotyping arrays

SUPPLEMENTARY DATA

**Supplementary Table S4.** Table of genotypic characteristics:

[www.well.ox.ac.uk/~nvanzuy/Onlinesupp.S1Table4.xlsx](http://www.well.ox.ac.uk/~nvanzuy/Onlinesupp.S1Table4.xlsx)

**Supplementary Table S5.** Replication was sought for 164 variants and results were returned for 108 of these variants for six dichotomous phenotypes and estimated glomerular filtration rate (eGFR, mL/min/1.73m<sup>2</sup>) in subjects with type 2 diabetes.

[www.well.ox.ac.uk/~nvanzuy/Onlinesupp.S1Table5.xlsx](http://www.well.ox.ac.uk/~nvanzuy/Onlinesupp.S1Table5.xlsx)

SUPPLEMENTARY DATA

**Supplementary Table S6.** Rs9942471 was associated ( $p \leq 5 \times 10^{-8}$ ) with microalbuminuria in subjects with T2D of European descent and was not associated with any other dichotomous diabetic kidney disease phenotype.

| Phenotype                                  | CHR | BP           | SNP       | Discovery   |                     |                      | Ancestry           | Replication |                     |      | Joint               |                      |        |
|--------------------------------------------|-----|--------------|-----------|-------------|---------------------|----------------------|--------------------|-------------|---------------------|------|---------------------|----------------------|--------|
|                                            |     |              |           | EA/NEA EAF  | OR (95%CI)          | P                    |                    | EAF         | OR (95%CI)          | P    | OR (95%CI)          | P                    | N      |
| Chronic kidney disease (CKD)               | 6   | 8994823<br>2 | rs9942471 | A/C<br>0.63 | 0.98<br>(0.89,1.07) | 0.50                 | European           | 0.62        | 1.10<br>(0.98,1.23) | 0.10 | 1.02<br>(0.95,1.10) | 0.41                 | 11,897 |
|                                            |     |              |           |             |                     |                      | Asian and European | 0.75        | 1.04<br>(0.96,1.13) | 0.31 | 1.01<br>(0.95,1.08) | 0.60                 | 19,236 |
| CKD and diabetic kidney disease (DKD)      | 6   | 8994823<br>2 | rs9942471 | A/C<br>0.63 | 1.06<br>(0.93,1.22) | 0.32                 | European           | 0.59        | 1.20<br>(0.88,1.64) | 0.45 | 1.07<br>(0.95,1.22) | 0.22                 | 2,834  |
|                                            |     |              |           |             |                     |                      | Asian and European | 0.79        | 1.10<br>(0.88,1.37) | 0.50 | 1.07<br>(0.95,1.21) | 0.23                 | 3,928  |
| All DKD                                    | 6   | 8994823<br>2 | rs9942471 | A/C<br>0.64 | 1.20<br>(1.12,1.29) | $4.8 \times 10^{-7}$ | European           | 0.62        | 1.12<br>(0.98,1.27) | 0.14 | 1.18<br>(1.11,1.25) | $3.8 \times 10^{-7}$ | 7,053  |
|                                            |     |              |           |             |                     |                      | Asian and European | 0.87        | 1.06<br>(0.98,1.15) | 0.18 | 1.13<br>(1.07,1.19) | $1.7 \times 10^{-4}$ | 19,253 |
| End-stage renal disease (ESRD) vs non ESRD | 6   | 8994823<br>2 | rs9942471 | A/C<br>0.64 | 0.85<br>(0.71,1.05) | 0.07                 | European           | 0.63        | 1.09<br>(0.88,1.36) | 0.42 | 0.94<br>(0.83,1.08) | 0.30                 | 6,455  |
|                                            |     |              |           |             |                     |                      | Asian and European | 0.82        | 1.16<br>(1.00,1.36) | 0.02 | 1.03<br>(0.93,1.13) | 0.46                 | 12,260 |

SUPPLEMENTARY DATA

| Phenotype            | CHR | BP           | SNP       | Discovery             |                     |                      | Replication                  |      |                         |      | Joint                   |                      |        |
|----------------------|-----|--------------|-----------|-----------------------|---------------------|----------------------|------------------------------|------|-------------------------|------|-------------------------|----------------------|--------|
|                      |     |              |           | EA/<br>NE<br>A<br>EAF | OR<br>(95%CI)       | P                    | Ancestr<br>y                 | EAF  | OR<br>(95%CI)           | P    | OR<br>(95%CI)           | P                    | N      |
| Late DKD             | 6   | 8994823<br>2 | rs9942471 | A/C<br>0.63           | 1.14<br>(1.04,1.25) | 0.01                 | Europea<br>n                 | 0.62 | 1.02<br>(0.86,1.2<br>0) | 0.32 | 1.11<br>(1.02,1.20<br>) | 0.05                 | 5,128  |
|                      |     |              |           |                       |                     |                      | Asian<br>and<br>Europea<br>n | 0.88 | 1.01<br>(0.93,1.1<br>0) | 0.85 | 1.06<br>(0.99,1.13<br>) | 0.22                 | 19,578 |
| Microalbuminur<br>ia | 6   | 8994823<br>2 | rs9942471 | A/C<br>0.64           | 1.24<br>(1.15,1.34) | 2.1x10 <sup>-7</sup> | Europea<br>n                 | 0.59 | 1.32<br>(1.09,1.5<br>9) | 0.06 | 1.25<br>(1.16,1.34<br>) | 4.5x10 <sup>-8</sup> | 4,801  |
|                      |     |              |           |                       |                     |                      | Asian<br>and<br>Europea<br>n | 0.85 | 1.11<br>(0.99-<br>1.23) | 0.91 | 1.15<br>(1.08,1.23<br>) | 1.2x10 <sup>-5</sup> | 5,652  |

SUPPLEMENTARY DATA

**Supplementary Table S7.** A cross comparison of top variants associated with diabetic kidney disease phenotypes in subjects with type 2 diabetes in subjects with type 1 diabetes (Shaded) (Sandholm et al, 2017).

| Phenotype          | SNP                             | EA/NEA | EAF  | In subjects with type 2 diabetes |                       | In subjects with type 1 diabetes |                       |
|--------------------|---------------------------------|--------|------|----------------------------------|-----------------------|----------------------------------|-----------------------|
|                    |                                 |        |      | OR/Beta (95%CI)                  | <i>p</i>              | OR/Beta (95%CI)                  | <i>p</i>              |
| ‘CKD’              | rs2206136 ( <i>PLCB4</i> )      | A/T    | 0.42 | 1.13 (1.05,1.21)                 | $9.0 \times 10^{-5}$  | 0.94 (0.85,1.04)                 | 0.23                  |
| ‘microalbuminuria’ | rs9942471 ( <i>GABRR1</i> )     | A/C    | 0.64 | 1.25 (1.16,1.34)                 | $4.50 \times 10^{-8}$ | 0.93 (0.82,1.05)                 | 0.26                  |
| ‘eGFR’             | rs11864909 ( <i>UMOD</i> )      | T/C    | 0.28 | 2.31 (1.54,3.09)                 | $4.60 \times 10^{-9}$ | 1.22 (-0.06,2.50)                | 0.07                  |
| ‘ESRD vs no ESRD’  | rs61277444 ( <i>PTPN13</i> )    | G/A    | 0.09 | Not available                    |                       | 1.41 (1.21,1.65)                 | $1.90 \times 10^{-6}$ |
| ‘ESRD vs controls’ | rs61277444 ( <i>PTPN13</i> )    | G/A    | 0.09 |                                  |                       | 1.42 (1.02,1.67)                 | $6.00 \times 10^{-6}$ |
| ‘ESRD vs no ESRD’  | rs7562121 ( <i>AFF3</i> )       | C/G    | 0.23 | 1.12 (0.97,1.30)                 | 0.21                  | 1.27 (1.17,1.39)                 | $3.50 \times 10^{-7}$ |
| ‘CKD+DKD’          | rs1989248<br>( <i>CNTNAP2</i> ) | C/A    | 0.28 | 0.73 (0.61,0.87)                 | $6.14 \times 10^{-4}$ | 1.26 (1.15,1.38)                 | $6.00 \times 10^{-7}$ |
| ‘ESRD vs controls’ | rs1989248<br>( <i>CNTNAP2</i> ) | C/A    | 0.28 | 0.71 (0.57,0.88)                 | 0.51                  | 1.29 (1.17,1.43)                 | $1.80 \times 10^{-6}$ |
| ‘All DKD’          | rs72809865 ( <i>NRG3</i> )      | T/C    | 0.16 | 1.11 (0.99,1.75)                 | 0.05                  | 1.17 (1.09,1.26)                 | $7.40 \times 10^{-6}$ |

SUPPLEMENTARY DATA

**Supplementary Table S8.** Phenotype definitions used in the combined analysis of diabetic kidney disease in subjects with type 1 diabetes or type 2 diabetes (T1D+T2D)

| Analysis                          | Case definition                                                                                                                                                                                                                         | Control definition                                                                                                                                                            | Type 1 and 2 diabetes |           |
|-----------------------------------|-----------------------------------------------------------------------------------------------------------------------------------------------------------------------------------------------------------------------------------------|-------------------------------------------------------------------------------------------------------------------------------------------------------------------------------|-----------------------|-----------|
|                                   |                                                                                                                                                                                                                                         |                                                                                                                                                                               | #Cases                | #Controls |
| All Diabetic kidney disease (DKD) | <b>All DKD:</b> Microalbuminuria OR OR Late DKD OR end-stage renal disease (ESRD)                                                                                                                                                       | Normoalbuminuria (Albumin excretion rate [AER] <20 µg/min OR AER <30 mg/24 h OR ACR <2.5/3.5 mg/mmol for men/women AND duration of T2D >10 years or duration of T1D >15 years | 5,908                 | 4,965     |
| Microalbuminuria                  | <b>Microalbuminuria:</b> At least 2 out of 3 consecutive measurements with albumin excretion rate (AER) ≥20 AND <200 µg/min OR AER ≥30 AND <300 mg/24 hr OR albumin to creatinine ratio (ACR) ≥2.5/3.5 AND <25/35 mg/mmol for men/women | Normoalbuminuria AND duration of T2D >10 years or duration of T1D >15 years                                                                                                   | 2,795                 | 4,831     |
| Late DKD                          | <b>Late DKD:</b> At least one measurement with AER ≥200 µg/min OR AER ≥300 mg/24 h OR ACR ≥25/35 mg/mmol for men/women) or end-stage renal disease (ESRD, eGFR < 15 mL/min/1.73m <sup>2</sup> OR kidney transplantation OR dialysis)    | Normoalbuminuria AND duration of T2D >10 years or duration of T1D >15 years                                                                                                   | 3,096                 | 4,965     |
| ESRD vs. controls                 | <b>ESRD:</b> eGFR < 15 mL/min/1.73m <sup>2</sup> OR kidney transplantation OR dialysis                                                                                                                                                  | No DKD AND duration of T2D >10 years or duration of T1D >15 years                                                                                                             | 1,184                 | 4,474     |
| ESRD vs. no ESRD                  | ESRD (see above)                                                                                                                                                                                                                        | No ESRD AND duration of T2D >10 years or duration of T1D >15 years                                                                                                            | 1,184                 | 8,466     |
| Chronic Kidney Disease (CKD)      | <b>CKD:</b> eGFR < 60 mL/min/1.73m <sup>2</sup>                                                                                                                                                                                         | No CKD AND duration of T2D >10 years or duration of T1D >15 years                                                                                                             | 5,554                 | 3,680     |

SUPPLEMENTARY DATA

| Analysis    | Case definition                                                                                                                               | Control definition                                                                                 | Type 1 and 2 diabetes |           |
|-------------|-----------------------------------------------------------------------------------------------------------------------------------------------|----------------------------------------------------------------------------------------------------|-----------------------|-----------|
|             |                                                                                                                                               |                                                                                                    | #Cases                | #Controls |
| CKD and DKD | <b>CKD and DKD:</b> eGFR < 60 mL/min/1.73m <sup>2</sup> AND DKD                                                                               | No CKD AND no ESRD AND normoalbuminuria AND duration of T2D >10 years or duration of T1D >15 years | 2,647                 | 2,995     |
| eGFR        | <b>eGFR:</b> eGFR=32788 x Serum Creatinine(μmol/L) <sup>-1.154</sup> x Agx10 <sup>-203</sup> x [0.742 if female] (mL/min/1.73m <sup>2</sup> ) |                                                                                                    | 13,158                | eGFR      |

**Supplementary Table S9.** The discovery, replication and joint analysis of the 47 lead variants selected for replication from seven dichotomous diabetic kidney disease and a continuous eGFR phenotype (mL/min/1.73m<sup>2</sup>) in the combined analysis of subjects with either type 1 or type 2 diabetes

[www.well.ox.ac.uk/~nvanzuy/Onlinesupp.S1Table8.xlsx](http://www.well.ox.ac.uk/~nvanzuy/Onlinesupp.S1Table8.xlsx)

SUPPLEMENTARY DATA

**Supplementary Table S10.** We report associations of reported diabetic kidney disease (DKD) variants with corresponding DKD phenotypes in this study at a  $p < 0.05$  irrespective of type of diabetes. In supplementary Figure 5 we show z scores for all DKD phenotypes from subjects with T2D and the combined analysis of subjects with T1D or T2D.

| PMID                          | SNP (Gene)                    | Phenotype        | Diabetes | Published |                  |                       |                       | Current study      |                      |                     |                      |
|-------------------------------|-------------------------------|------------------|----------|-----------|------------------|-----------------------|-----------------------|--------------------|----------------------|---------------------|----------------------|
|                               |                               |                  |          | E A       | EA F             | Effect (95%CI)        | P                     | trait              | Diabetes             | Effect (95%CI)      | P                    |
| 15793268                      | rs1800764 ( <i>ACE</i> )      | Microalbuminuria | T1D      | C         | 0.46             | 1.11 (1.01,1.22)      | 0.04                  | 'Microalbuminuria' | T2D                  | 0.87 (0.78,0.97)    | 0.02                 |
| 19430482                      | rs12917707 ( <i>UMOD</i> )    | CKD              | -        | G         | 0.80             | 1.32 (1.24,1.4)       | $5.2 \times 10^{-16}$ | 'CKD'              | T1D+T2D              | 1.06 (0.99,1.14)    | 0.02                 |
|                               |                               |                  |          |           |                  |                       |                       |                    | T2D                  | 1.08 (0.99,1.18)    | 0.02                 |
|                               |                               |                  |          |           |                  |                       |                       |                    | T1D+T2D              | 1.93 (1.25,2.61)    | $2.9 \times 10^{-6}$ |
|                               | rs12917707 ( <i>UMOD</i> )    | eGFR             | -        | T         | 0.20             | 0.02 (0.02,0.03)      | $2.3 \times 10^{-12}$ | 'eGFR'             | T1D+T2D              | 0.02 (0.01,0.03)    | $6.2 \times 10^{-6}$ |
|                               |                               |                  |          |           |                  |                       |                       |                    | T2D                  | 1.96 (1.20,2.73)    | 0.05                 |
|                               | rs17319721 ( <i>SHROOM3</i> ) | eGFR             | -        | A         | 0.44             | 0.01 (0.01,0.02)      | $1.0 \times 10^{-12}$ | 'eGFR'             | T1D+T2D              | -1.11 (-1.88,-0.34) | $4.9 \times 10^{-3}$ |
| rs2467853 ( <i>SPATAGL1</i> ) | eGFR                          | -                | G        | 0.39      | 0.01 (0.01,0.02) | $6.0 \times 10^{-14}$ | 'eGFR'                | T1D+T2D            | -0.95 (-1.75,-0.149) | 0.02                |                      |
| 20383146                      | rs7805747 ( <i>PRKGA2</i> )   | CKD              | -        | A         | 0.24             | 1.18 (1.11,1.25)      | $4.0 \times 10^{-12}$ | 'CKD'              | T1D+T2D              | 1.09 (1,1.18)       | 0.01                 |
|                               |                               |                  |          |           |                  |                       |                       |                    | T2D                  | 1.10 (0.99,1.22)    | 0.03                 |



SUPPLEMENTARY DATA

| PMID     | SNP (Gene)                              | Phenotype | Diabetes | Published |      |                     |                      | Current study        |                    |                     |                      |                      |                      |
|----------|-----------------------------------------|-----------|----------|-----------|------|---------------------|----------------------|----------------------|--------------------|---------------------|----------------------|----------------------|----------------------|
|          |                                         |           |          | E A       | EA F | Effect (95%CI)      | P                    | trait                | Diabetes           | Effect (95%CI)      | P                    |                      |                      |
| 20962522 | rs1800783<br>( <i>NOS3</i> )            | DKD       | T1D      | T         | 0.63 | 1.26<br>(1.1,1.45)  | 6.0×10 <sup>-4</sup> | ‘all DKD’            | T1D+T2D            | 1.06<br>(0.99,1.13) | 0.03                 |                      |                      |
|          |                                         |           |          | A         | 0.74 | 1.01<br>(0.93,1.10) |                      | 0.10                 | ‘all DKD’          | T1D+T2D             |                      | 0.90<br>(0.84,0.97)  | 5.8×10 <sup>-3</sup> |
|          | rs5186 ( <i>AGTR1</i> )                 | DKD       | T1D+T2D  | A         | 0.74 | 1.01<br>(0.93,1.10) | 0.10                 | ‘all DKD’            | T2D                | 0.90<br>(0.81,0.99) | 0.02                 |                      |                      |
| 23028342 | rs833061<br>( <i>VEGFA</i> )            | DKD       | T1D+T2D  | T         | 0.5  | 2.08<br>(1.64,2.65) | 0.32                 | ‘all DKD’            | T2D                | 0.91<br>(0.84,0.98) | 0.03                 |                      |                      |
|          |                                         |           |          | G         | 0.06 | 1.72<br>(1.36,2.18) |                      | 2.0×10 <sup>-9</sup> | ‘ESRD vs controls’ | T1D+T2D             |                      | 1.30<br>(0.99,1.71)  | 3.6×10 <sup>-3</sup> |
|          |                                         |           |          | C         | 0.31 | 1.34<br>(1.21,1.48) |                      | 1.2×10 <sup>-8</sup> | ‘ESRD vs non ESRD’ | T1D+T2D             |                      | 1.40<br>(1.06,1.85)  | 1.2×10 <sup>-3</sup> |
| 24871321 | rs12137135<br>( <i>WNT4-ZBTB40</i> )    | ESRD      | T1D      | G         | 0.16 | Bayesian Analysis   |                      | ‘ESRD vs controls’   | T1D+T2D            | 1.20<br>(1.02,1.40) | 0.02                 |                      |                      |
|          |                                         |           |          | T         | 0.12 |                     |                      | ‘ESRD vs non ESRD’   | T1D+T2D            | 1.22<br>(1.13,1.32) |                      | 4.8×10 <sup>-4</sup> |                      |
|          |                                         |           |          | T         | 0.12 |                     |                      | ESRD vs non ESRD     | T1D+T2D            | 1.23<br>(1.06,1.43) |                      | 8.1×10 <sup>-3</sup> |                      |
|          | rs12917114<br>( <i>SEMA6D-SLC24A5</i> ) | ESRD      | T1D      | T         | 0.12 |                     |                      | ESRD vs non ESRD     | T1D+T2D            | 1.24<br>(1.05,1.46) | 7.9×10 <sup>-3</sup> |                      |                      |

SUPPLEMENTARY DATA

| PMID | SNP (Gene)                | Phenotype | Diabetes | Published |         |                   | Current study |       |                    |                   |                     |                      |
|------|---------------------------|-----------|----------|-----------|---------|-------------------|---------------|-------|--------------------|-------------------|---------------------|----------------------|
|      |                           |           |          | E<br>A    | EA<br>F | Effect<br>(95%CI) | P             | trait | Diabetes           | Effect<br>(95%CI) | P                   |                      |
|      | rs1670754 (4p15)          | ESRD      | T1D      | A         | 0.19    |                   |               |       | 'ESRD vs non ESRD' | T1D+T2D           | 1.16<br>(1.02,1.32) | 0.04                 |
|      | rs2838302 ( <i>SIK1</i> ) | ESRD      | T1D      | G         | 0.08    |                   |               |       | 'ESRD vs controls' | T1D+T2D           | 1.28<br>(1.03,1.58) | $4.7 \times 10^{-3}$ |
|      |                           |           |          |           |         |                   |               |       | 'ESRD vs non ESRD' | T1D+T2D           | 1.39<br>(1.12,1.74) | $3.9 \times 10^{-4}$ |

SUPPLEMENTARY DATA

**Supplementary Table S11.** Results of a genetic risk score analysis of diabetic kidney disease (DKD) related risk factors and different DKD phenotypes ( $p < 2.3 \times 10^{-3}$ )

| <b>DKD PHENOTYPE</b>    | <b>GENETIC RISK SCORE</b>        | <b>OR(95%CI)</b> | <b>PVAL</b>          |
|-------------------------|----------------------------------|------------------|----------------------|
| T1D and T2D Late DKD    | Body mass index (BMI)            | 2.12 (1.55,2.90) | $2.3 \times 10^{-6}$ |
| T1D and T2D Late DKD    | Body mass index (z transformed)  | 2.04 (1.48,2.82) | $1.6 \times 10^{-5}$ |
| T1D and T2D All DKD     | Body mass index (BMI)            | 1.75 (1.35,2.27) | $2.4 \times 10^{-5}$ |
| T1D and T2D All DKD     | Body mass index (z transformed)  | 1.68 (1.28,2.19) | $1.5 \times 10^{-4}$ |
| T2D All DKD             | Body mass index (BMI)            | 2.02 (1.40,2.92) | $1.8 \times 10^{-4}$ |
| T1D and T2D CKD         | Body mass index (z transformed)  | 1.73 (1.29,2.32) | $2.7 \times 10^{-4}$ |
| T2D ESRD vs no ESRD     | Waist-Hip Ratio (BMI adj.)       | 4.19 (1.87,9.36) | $4.8 \times 10^{-4}$ |
| T1D and T2D CKD         | Body mass index (BMI)            | 1.62 (1.21,2.17) | $1.3 \times 10^{-3}$ |
| T2D ESRD vs no ESRD     | Insulin resistance (N SNPs = 10) | 1.09 (1.03,1.14) | $1.6 \times 10^{-3}$ |
| T2D ESRD vs controls    | Insulin resistance (N SNPs = 10) | 1.09 (1.03,1.15) | $1.7 \times 10^{-3}$ |
| T2D ESRD vs controls    | Waist-Hip Ratio (BMI adj.)       | 4.04 (1.69,9.66) | $1.7 \times 10^{-3}$ |
| T2D Late DKD            | Body mass index (BMI)            | 2.12 (1.32,3.40) | $1.8 \times 10^{-3}$ |
| T1D and T2D CKD and DKD | Body mass index (BMI)            | 1.84 (1.25,2.70) | $1.8 \times 10^{-3}$ |

SUPPLEMENTARY DATA

**Supplementary Table S12.** The Finnish Diabetic Nephropathy Study Centres

| Centre                                                                               | Members                                                                                                                                                                                                    |
|--------------------------------------------------------------------------------------|------------------------------------------------------------------------------------------------------------------------------------------------------------------------------------------------------------|
| Anjalankoski Health Center                                                           | S.Koivula, T.Uggeldahl                                                                                                                                                                                     |
| Central Finland Central Hospital, Jyväskylä                                          | T.Forslund, A.Halonen, A.Koistinen, P.Koskiaho, M.Laukkanen, J.Saltevo, M.Tiihonen                                                                                                                         |
| Central Hospital of Åland Islands, Mariehamn                                         | M.Forsen, H.Granlund, A.-C.Jonsson, B.Nyroos                                                                                                                                                               |
| Central Hospital of Kanta-Häme, Hämeenlinna                                          | P.Kinnunen, A.Orvola, T.Salonen, A.Vähänen                                                                                                                                                                 |
| Central Hospital of Kymenlaakso, Kotka                                               | R.Paldanius, M.Riihelä, L.Ryysy                                                                                                                                                                            |
| Central Hospital of Länsi-Pohja, Kemi                                                | H.Laukkanen, P.Nyländen, A.Sademies                                                                                                                                                                        |
| Central Ostrobothnian Hospital District, Kokkola                                     | S.Anderson, B.Asplund, U.Byskata, P.Liedes, M.Kuusela, T.Virkkala                                                                                                                                          |
| City of Espoo Health Center                                                          |                                                                                                                                                                                                            |
| Espoonlahti                                                                          | A.Nikkola, E.Ritola                                                                                                                                                                                        |
| Tapiola                                                                              | M.Niska, H.Saarinen                                                                                                                                                                                        |
| Samaria                                                                              | E.Oukko-Ruonen, T.Virtanen                                                                                                                                                                                 |
| City of Helsinki Health Center                                                       | Viherlaakso A.Lyytinen                                                                                                                                                                                     |
| Puistola                                                                             | H.Kari, T.Simonen                                                                                                                                                                                          |
| Suutarila                                                                            | A.Kaprio, J.Kärkkäinen, B.Rantaeskola                                                                                                                                                                      |
| Töölö                                                                                | P.Kääriäinen, J.Haaga, A-L.Pietiläinen                                                                                                                                                                     |
| City of Hyvinkää Health Center                                                       | S.Klemetti, T.Nyandoto, E.Rontu, S.Satuli-Autere                                                                                                                                                           |
| City of Vantaa Health Center:                                                        |                                                                                                                                                                                                            |
| Korso                                                                                | R.Toivonen, H.Virtanen                                                                                                                                                                                     |
| Länsimäki                                                                            | R.Ahonen, M.Ivaska-Suomela, A.Jauhiainen                                                                                                                                                                   |
| Martinlaakso                                                                         | M.Laine, T.Pellonpää, R.Puranen                                                                                                                                                                            |
| Myyrmäki                                                                             | A.Airas, J.Laakso, K.Rautavaara                                                                                                                                                                            |
| Rekola                                                                               | M.Erola, E.Jatkola                                                                                                                                                                                         |
| Tikkurila                                                                            | R.Lönnblad, A.Malm, J.Mäkelä, E.Rautamo                                                                                                                                                                    |
| Heinola Health Center                                                                | P.Hentunen, J.Lagerstam                                                                                                                                                                                    |
| Helsinki University Central Hospital, Department of Medicine, Division of Nephrology | M.Feodoroff, D.Gordin, O.Heikkilä, K.Hietala, J.Fagerudd, M.Korolainen, L.Kyllönen, J.Kytö, S.Lindh, K.Pettersson-Fernholm, M.Rosengård-Bärlund, A.Sandelin, L.Thorn, J.Tuomikangas, T.Vesisenaho, J.Wadén |
| Herttoniemi Hospital, Helsinki                                                       | V.Sipilä                                                                                                                                                                                                   |
| Hospital of Lounais-Häme, Forssa                                                     | T.Kalliomäki, J.Koskelainen, R.Nikkanen, N.Savolainen, H.Sulonen, E.Valtonen                                                                                                                               |
| Hyvinkää Hospital                                                                    | L. Norvio, A.Hämäläinen                                                                                                                                                                                    |
| Iisalmi Hospital                                                                     | E.Toivanen                                                                                                                                                                                                 |
| Jokilaakso Hospital, Jämsä                                                           | A.Parta, I.Pirttiniemi                                                                                                                                                                                     |
| Jorvi Hospital, Helsinki University Central Hospital                                 | S.Aranko, S.Ervasti, R.Kauppinen-Mäkelin, A.Kuusisto, T.Leppälä, K.Nikkilä, L.Pekkonen                                                                                                                     |
| Jyväskylä Health Center, Kyllö                                                       | K.Nuorva, M.Tiihonen                                                                                                                                                                                       |
| Kainuu Central Hospital, Kajaani                                                     | S.Jokelainen, K.Kananen, M.Karjalainen, P.Kemppainen, A-M.Mankinen, A.Reponen, M.Sankari                                                                                                                   |

SUPPLEMENTARY DATA

| Centre                                                                                     | Members                                                                                                                                                                                                                 |
|--------------------------------------------------------------------------------------------|-------------------------------------------------------------------------------------------------------------------------------------------------------------------------------------------------------------------------|
| Kerava Health Center                                                                       | H.Stuckey, P.Suominen                                                                                                                                                                                                   |
| Kirkkonummi Health Center                                                                  | A.Lappalainen, M.Liimatainen, J.Santaholma                                                                                                                                                                              |
| Kivelä Hospital, Helsinki                                                                  | A.Aimolahti, E.Huovinen                                                                                                                                                                                                 |
| Koskela Hospital, Helsinki                                                                 | V.Ilkka, M.Lehtimäki                                                                                                                                                                                                    |
| Kotka Health Center                                                                        | E.Pälikkö-Kontinen, A.Vanhanen                                                                                                                                                                                          |
| Kouvola Health Center                                                                      | E.Koskinen, T.Siitonen                                                                                                                                                                                                  |
| Kuopio University Hospital                                                                 | E.Huttunen, R.Ikäheimo, P.Karhapää,<br>P.Kekäläinen, M.Laakso, T.Lakka, E.Lampainen,<br>L.Moilanen, S. Tanskanen, L.Niskanen, U.Tuovinen,<br>I.Vauhkonen, E.Voutilainen                                                 |
| Centre                                                                                     | Members                                                                                                                                                                                                                 |
| Anjalankoski Health Center                                                                 | S.Koivula, T.Uggeldahl                                                                                                                                                                                                  |
| Central Finland Central Hospital, Jyväskylä                                                | T.Forslund, A.Halonen, A.Koistinen, P.Koskiaho,<br>M.Laukkanen, J.Saltevo, M.Tiihonen                                                                                                                                   |
| Central Hospital of Åland Islands, Mariehamn                                               | M.Forsen, H.Granlund, A.-C.Jonsson, B.Nyroos                                                                                                                                                                            |
| Central Hospital of Kanta-Häme, Hämeenlinna                                                | P.Kinnunen, A.Orvola, T.Salonen, A.Vähänen                                                                                                                                                                              |
| Central Hospital of Kymenlaakso, Kotka                                                     | R.Paldanius, M.Riihelä, L.Ryysy                                                                                                                                                                                         |
| Central Hospital of Länsi-Pohja, Kemi                                                      | H.Laukkanen, P.Nyländen, A.Sademies                                                                                                                                                                                     |
| Central Ostrobothnian Hospital<br>District, Kokkola                                        | S.Anderson, B.Asplund, U.Byskata,<br>P.Liedes, M.Kuusela, T.Virkkala                                                                                                                                                    |
| City of Espoo Health Center                                                                |                                                                                                                                                                                                                         |
| Espoonlahti                                                                                | A.Nikkola, E.Ritola                                                                                                                                                                                                     |
| Tapiola                                                                                    | M.Niska, H.Saarinen                                                                                                                                                                                                     |
| Samaria                                                                                    | E.Oukko-Ruonen, T.Virtanen                                                                                                                                                                                              |
| City of Helsinki Health Center                                                             | Viherlaakso A.Lyytinen                                                                                                                                                                                                  |
| Puistola                                                                                   | H.Kari, T.Simonen                                                                                                                                                                                                       |
| Suutarila                                                                                  | A.Kaprio, J.Kärkkäinen, B.Rantaeskola                                                                                                                                                                                   |
| Töölö                                                                                      | P.Kääriäinen, J.Haaga, A-L.Pietiläinen                                                                                                                                                                                  |
| City of Hyvinkää Health Center                                                             | S.Klemetti, T.Nyandoto, E.Rontu, S.Satuli-Autere                                                                                                                                                                        |
| City of Vantaa Health Center:                                                              |                                                                                                                                                                                                                         |
| Korso                                                                                      | R.Toivonen, H.Virtanen                                                                                                                                                                                                  |
| Länsimäki                                                                                  | R.Ahonen, M.Ivaska-Suomela, A.Jauhiainen                                                                                                                                                                                |
| Martinlaakso                                                                               | M.Laine, T.Pellonpää, R.Puranen                                                                                                                                                                                         |
| Myyrmäki                                                                                   | A.Airas, J.Laakso, K.Rautavaara                                                                                                                                                                                         |
| Rekola                                                                                     | M.Erola, E.Jatkola                                                                                                                                                                                                      |
| Tikkurila                                                                                  | R.Lönnblad, A.Malm, J.Mäkelä, E.Rautamo                                                                                                                                                                                 |
| Heinola Health Center                                                                      | P.Hentunen, J.Lagerstam                                                                                                                                                                                                 |
| Helsinki University Central Hospital,<br>Department of Medicine, Division of<br>Nephrology | M.Feodoroff, D.Gordin, O.Heikkilä, K.Hietala,<br>J.Fagerudd, M.Korolainen, L.Kyllönen, J.Kytö,<br>S.Lindh, K.Pettersson-Fernholm, M.Rosengård-<br>Bärlund, A.Sandelin, L.Thorn, J.Tuomikangas,<br>T.Vesisenaho, J.Wadén |
| Herttoniemi Hospital, Helsinki                                                             | V.Sipilä                                                                                                                                                                                                                |
| Hospital of Lounais-Häme, Forssa                                                           | T.Kalliomäki, J.Koskelainen, R.Nikkanen,<br>N.Savolainen, H.Sulonen, E.Valtonen                                                                                                                                         |

SUPPLEMENTARY DATA

| Centre                                               | Members                                                                                                                                                        |
|------------------------------------------------------|----------------------------------------------------------------------------------------------------------------------------------------------------------------|
| Hyvinkää Hospital                                    | L. Norvio, A.Hämäläinen                                                                                                                                        |
| Iisalmi Hospital                                     | E.Toivanen                                                                                                                                                     |
| Jokilaakso Hospital, Jämsä                           | A.Parta, I.Pirttiniemi                                                                                                                                         |
| Jorvi Hospital, Helsinki University Central Hospital | S.Aranko, S.Ervasti, R.Kauppinen-Mäkelin, A.Kuusisto, T.Leppälä, K.Nikkilä, L.Pekkonen                                                                         |
| Jyväskylä Health Center, Kyllö                       | K.Nuorva, M.Tiihonen                                                                                                                                           |
| Kainuu Central Hospital, Kajaani                     | S.Jokelainen, K.Kananen, M.Karjalainen, P.Kemppainen, A-M.Mankinen, A.Reponen, M.Sankari                                                                       |
| Kerava Health Center                                 | H.Stuckey, P.Suominen                                                                                                                                          |
| Kirkkonummi Health Center                            | A.Lappalainen, M.Liimatainen, J.Santaholma                                                                                                                     |
| Kivelä Hospital, Helsinki                            | A.Aimolahti, E.Huovinen                                                                                                                                        |
| Koskela Hospital, Helsinki                           | V.Ilkka, M.Lehtimäki                                                                                                                                           |
| Kotka Health Center                                  | E.Pälikkö-Kontinen, A.Vanhanen                                                                                                                                 |
| Kouvola Health Center                                | E.Koskinen, T.Siitonen                                                                                                                                         |
| Kuopio University Hospital                           | E.Huttunen, R.Ikäheimo, P.Karhapää, P.Kekäläinen, M.Laakso, T.Lakka, E.Lampainen, L.Moilanen, S. Tanskanen, L.Niskanen, U.Tuovinen, I.Vauhkonen, E.Voutilainen |

**Supplementary Table S13.** Hong Kong Diabetes Registry TRS Project Group members.

| Group Members                      |
|------------------------------------|
| Ronald C.W. Ma <sup>1,2,3,4</sup>  |
| Juliana C.N. Chan <sup>1,2,3</sup> |
| Yu Huang <sup>5</sup>              |
| Hui-yao Lan <sup>1,3</sup>         |
| Si Lok <sup>3</sup>                |
| Brian Tomlinson <sup>1</sup>       |
| Stephen K.W. Tsui <sup>5</sup>     |
| Weichuan Yu <sup>6</sup>           |
| Kevin Y.L. Yip <sup>7</sup>        |
| Ting Fung Chan <sup>8</sup>        |
| Xiaodan Fan <sup>9</sup>           |
| Wing Yee So <sup>1,2</sup>         |
| Cheuk Chun Szeto <sup>1</sup>      |
| Nelson Tang <sup>3</sup>           |
| Andrea O. Luk <sup>1,2,3</sup>     |
| Xiaoyu Tian <sup>5</sup>           |
| Guozhi Jiang <sup>1</sup>          |

## SUPPLEMENTARY DATA

Claudia H.T. Tam<sup>1</sup>

Heung Man Lee<sup>1</sup>

Cadmon K.P. Lim<sup>1</sup>

Katie K.H. Chan<sup>2</sup>

Fangying Xie<sup>1</sup>

Alex C.W. Ng<sup>1</sup>

Grace P.Y. Cheung<sup>1</sup>

Ming-wai Yeung<sup>1</sup>

Shi Mai<sup>5</sup>

Fei Xie<sup>1</sup>

Sen Zhang<sup>6</sup>

Pu Yu<sup>6</sup>

Meng Weng<sup>6</sup>

---

### **Affiliations**

---

<sup>1</sup>Department of Medicine and Therapeutics, The Chinese University of Hong Kong, Hong Kong

<sup>2</sup>Hong Kong Institute of Diabetes and Obesity, The Chinese University of Hong Kong, Hong Kong

<sup>3</sup>Li Ka Shing Institute of Health Sciences, The Chinese University of Hong Kong, Hong Kong

<sup>4</sup>Integrated Bioinformatics Laboratory for Cancer Biology and Metabolic Diseases, The Chinese University of Hong Kong, Hong Kong

<sup>5</sup>School of Biomedical Sciences, The Chinese University of Hong Kong

<sup>6</sup>Department of Electronic and Computer Engineering, The Hong Kong University of Science and Technology

SUPPLEMENTARY DATA

<sup>7</sup> Department of Computer Science and Engineering, The Chinese University of Hong Kong

<sup>8</sup> School of Life Sciences, The Chinese University of Hong Kong

<sup>9</sup> Department of Statistics, The Chinese University of Hong Kong, Hong Kong

**Supplementary Table S14.** Group membership of The Warren 3/UK GoKinD Study Group

| Centre     | Members                                     |
|------------|---------------------------------------------|
| Belfast    | A. P. Maxwell, A. J. McKnight, D. A. Savage |
| Edinburgh  | J. Walker                                   |
| London     | S. Thomas, G. C. Viberti                    |
| Manchester | A. J. M. Boulton                            |
| Newcastle  | S. Marshall                                 |
| Plymouth   | A. G. Demaine, B. A. Millward               |
| Swansea    | S. C. Bain                                  |

**Supplementary Table S15.** Membership of the GENIE Consortium

|                     |                                                                                                                                                                                                                                                                                                                                                                                                                                                                                                                                                                                                                                                                                                                                                                                            |
|---------------------|--------------------------------------------------------------------------------------------------------------------------------------------------------------------------------------------------------------------------------------------------------------------------------------------------------------------------------------------------------------------------------------------------------------------------------------------------------------------------------------------------------------------------------------------------------------------------------------------------------------------------------------------------------------------------------------------------------------------------------------------------------------------------------------------|
| FinnDiane, Finland: | Niina Sandholm <sup>1,2,3</sup> , Carol Forsblom <sup>1,2</sup> , Valma Harjutsalo <sup>1,2,4</sup> , Ville-Petteri Mäkinen <sup>1,2, 4,6</sup> , Aila J Ahola <sup>1,2</sup> , Emma Dahlström <sup>1,2</sup> , Daniel Gordin <sup>1,2</sup> , Outi Heikkilä <sup>1,2</sup> , Kustaa Hietala <sup>1,7</sup> , Janne Kytö <sup>1,7</sup> , Markku Lehto <sup>1,2</sup> , Raija Lithovius <sup>1,2</sup> , Nicolae Mircea Panduru <sup>1,8</sup> , Maija Parkkonen <sup>1,2</sup> , Milla Rosengård-Bärlund <sup>1,2</sup> , Markku Saraheimo <sup>1,2</sup> , Jenny Söderlund <sup>1,2</sup> , Aino Soro-Paavonen <sup>1,2</sup> , Anna Syreeni <sup>1,2</sup> , Lena M Thorn <sup>1,2</sup> , Nina Tolonen <sup>1,2</sup> , Johan Wadén <sup>1,2</sup> , Per-Henrik Groop <sup>1,2,9</sup> |
| Belfast, UK:        | Amy Jayne McKnight <sup>10</sup> , Gareth J. McKay <sup>10</sup> , Alexander P. Maxwell <sup>10,11</sup>                                                                                                                                                                                                                                                                                                                                                                                                                                                                                                                                                                                                                                                                                   |
| Boston, MA, USA:    | Rany M. Salem <sup>12,13,14</sup> , Tamara Isakova <sup>15,16</sup> , Cameron Palmer <sup>12,13</sup> , Candace Guiducci <sup>12</sup> , Andrew Taylor <sup>12,17</sup> , Daniel B. Mirel <sup>12</sup> , Winfred W. Williams <sup>14,17</sup> , Joel N. Hirschhorn <sup>12,13,14</sup> , Jose C. Florez <sup>12,14,17</sup>                                                                                                                                                                                                                                                                                                                                                                                                                                                               |
| Dublin, Ireland:    | Eoin P. Brennan <sup>18,19</sup> , Denise M. Sadlier <sup>18,19</sup> , Finian Martin <sup>18,19</sup> , Catherine Godson <sup>18,19</sup>                                                                                                                                                                                                                                                                                                                                                                                                                                                                                                                                                                                                                                                 |
| Affiliations:       | Folkhälsan Institute of Genetics, Folkhälsan Research Center, Helsinki, Finland<br>Department of Medicine, Division of Nephrology, Helsinki University Central Hospital, Helsinki, Finland<br>Department of Biomedical Engineering and Computational Science, Aalto University, Espoo, Finland<br>Diabetes Prevention Unit, National Institute for Health and Welfare, Helsinki, Finland.<br>Department of Integrative Biology and Physiology, University of California                                                                                                                                                                                                                                                                                                                    |



SUPPLEMENTARY DATA

|                                                                                                                                                                                                                                                                                                                                                                                                                                                                                                                                                                                                                                                                                                                                                                                                                                                                                                                                                                                                                                                                                                                                                                                                                                                                                                                                                                                                                                                                                                                                               |
|-----------------------------------------------------------------------------------------------------------------------------------------------------------------------------------------------------------------------------------------------------------------------------------------------------------------------------------------------------------------------------------------------------------------------------------------------------------------------------------------------------------------------------------------------------------------------------------------------------------------------------------------------------------------------------------------------------------------------------------------------------------------------------------------------------------------------------------------------------------------------------------------------------------------------------------------------------------------------------------------------------------------------------------------------------------------------------------------------------------------------------------------------------------------------------------------------------------------------------------------------------------------------------------------------------------------------------------------------------------------------------------------------------------------------------------------------------------------------------------------------------------------------------------------------|
| <p>Los Angeles, United States<br/>         South Australian Health and Medical Research Institute, Adelaide, Australia<br/>         Department of Ophthalmology, Helsinki University Central Hospital, Helsinki, Finland.<br/>         Chair of pathophysiology, 2nd clinical Department, "Carol Davila" University of Medicine and Pharmacy, Bucharest, Romania.<br/>         Baker IDI Heart and Diabetes Institute, Melbourne, Australia.<br/>         Nephrology Research, Centre for Public Health, Queen's University of Belfast, Belfast, UK.<br/>         Regional Nephrology Unit, Level 11, Tower Block, Belfast City Hospital, Belfast, UK.<br/>         Program in Medical and Population Genetics, Broad Institute, Cambridge, MA, USA.<br/>         Endocrine Research Unit, Department of Endocrinology, Children's Hospital, Boston, MA, USA.<br/>         Department of Medicine, Harvard Medical School, Boston, MA, USA.<br/>         Division of Nephrology and Hypertension, University of Miami, Miami, Florida, USA<br/>         Center for Translational Metabolism and Health - Institute for Public Health and Medicine, Northwestern University Feinberg School of Medicine, Chicago, Illinois, USA<br/>         Center for Human Genetic Research, Massachusetts General Hospital, Boston, MA, USA.<br/>         Diabetes Research Centre, Conway Institute, School of Medicine and Medical Sciences, University College Dublin, Dublin, Ireland.<br/>         Mater Misericordiae Hospital, Dublin, Ireland.</p> |
|-----------------------------------------------------------------------------------------------------------------------------------------------------------------------------------------------------------------------------------------------------------------------------------------------------------------------------------------------------------------------------------------------------------------------------------------------------------------------------------------------------------------------------------------------------------------------------------------------------------------------------------------------------------------------------------------------------------------------------------------------------------------------------------------------------------------------------------------------------------------------------------------------------------------------------------------------------------------------------------------------------------------------------------------------------------------------------------------------------------------------------------------------------------------------------------------------------------------------------------------------------------------------------------------------------------------------------------------------------------------------------------------------------------------------------------------------------------------------------------------------------------------------------------------------|

**Supplementary Table S16.** DCCT/EDIC group members

| <b>CLINIC #</b> | <b>CLINIC NAME</b>               | <b>STUDY COORDINATORS</b>          | <b>PRINCIPAL INVESTIGATORS</b>        |
|-----------------|----------------------------------|------------------------------------|---------------------------------------|
| 01              | Case Western Reserve University  | Lynne Mayer                        | Rose Gubitosi-Klug                    |
| 02              | University of Pennsylvania       | Patti Bourne                       | Mark Schutta                          |
| 03              | Cornell University               | Mary Ellen Lackaye                 | Naina Sinha Gregory                   |
| 04              | Henry Ford Health System         | Davida Kruger<br>J. Kimberly Jones | Arti Bhan                             |
| 05              | Joslin Diabetes Center           | Ellen Golden                       | Lloyd Aiello                          |
| 06              | Massachusetts General Hospital   | Mary Larkin                        | David Nathan                          |
| 07              | Mayo Clinic                      | Georgia Ziegler                    | John Service                          |
| 08              | Med University of South Carolina | Susan Caulder<br>Clare Pittman     | Louis Luttrell<br>Maria Lopes-Virella |

SUPPLEMENTARY DATA

|    |                                 |                                 |                                    |
|----|---------------------------------|---------------------------------|------------------------------------|
| 09 | International Diabetes Center   | Mary Johnson<br>Kimberly Gunyou | Richard Bergenstal                 |
| 10 | University of Iowa              | Brenda Vittetoe                 | William Sivitz                     |
| 11 | University of Minnesota         | Nancy Flaherty                  | John Bantle                        |
| 12 | University of Missouri          | Susan Hitt                      | David Goldstein<br>Dean Hainsworth |
| 13 | University of Pittsburgh        | Lori Cimino                     | Trevor Orchard                     |
| 14 | University of Tennessee         | Christine Wigley                | Samuel Dagogo-Jack                 |
| 15 | University of Texas             | Suzanne Strowig                 | Philip Raskin                      |
| 16 | University of Toronto           | Annette Barnie                  | Bernard Zinman                     |
| 17 | University of Washington        | Robyn Fahlstrom                 | Jerry Palmer                       |
| 18 | University of Western Ontario   | Judith Harth<br>Marsha Driscoll | Charlotte McDonald                 |
| 19 | Vanderbilt University           | Janie Lipps Hagan               | Michael May                        |
| 20 | Washington University St. Louis | Lucy Levandoski                 | Neil White                         |

| <b>CLINIC #</b>            | <b>CLINIC NAME</b>              | <b>STUDY COORDINATORS</b>      | <b>PRINCIPAL INVESTIGATORS</b>     |
|----------------------------|---------------------------------|--------------------------------|------------------------------------|
| 21                         | Yale University                 | Patricia Gatcomb               | William Tamborlane                 |
| 23                         | Northwestern University         | Daphne Adelman<br>Susan Colson | Mark Molitch                       |
| 24                         | University California San Diego | Gayle Lorenzi                  | Sunder Mudaliar                    |
| 25                         | University of MD Baltimore      | Sherry<br>Johnsonbaugh         | Ryan Miller                        |
| 26                         | University of New Mexico        | Janene Canady                  | David Schade                       |
| 27                         | University of South Florida     | Maria Luisa Bernal             | John Malone<br>Anthony Morrison    |
| 41                         | University of Michigan          | Catherine Martin               | William Herman<br>Rodica Pop-Busui |
| <b>Executive Committee</b> | <b>Title</b>                    | <b>Name</b>                    |                                    |
|                            | Co-Chairman                     | David Nathan                   |                                    |
|                            | NIDDK Project Scientist         | Catherine Cowie                |                                    |

SUPPLEMENTARY DATA

|                      |                                                     |                    |
|----------------------|-----------------------------------------------------|--------------------|
|                      | NIDDK Program Director                              | Ellen Leschek      |
|                      | Lead Research Scientist                             | Patricia Cleary    |
|                      | Principal Investigator Data Coordinating Center     | John Lachin        |
|                      | Vice Chairman                                       | Bernie Zinman      |
|                      | Chair, P&P Committee                                |                    |
|                      | Principal Investigator Clinical Coordinating Center | Rose Gubitosi-Klug |
|                      | Co-Chair, Study Coordinators                        | Gayle Lorenzi      |
|                      | Chair, DQA Committee                                |                    |
|                      | Co-Chair, Study Coordinators                        | Catherine Martin   |
|                      | Director Data Coordinating Center                   | Barbara Braffett   |
| <b>Central Units</b> | <b>Title</b>                                        | <b>Name</b>        |
|                      | Principal Investigator                              | Mike Steffes       |
|                      | Project Manager                                     | Valerie Arends     |
|                      | Director                                            | Barbara Blodi      |
|                      | Principal Investigator                              | Ronald Danis       |
|                      | Project Manager                                     | Daniel Lawrence    |
|                      | Lead Photographer                                   | Hugh Wabers        |
|                      | Director                                            | Elsayed Soliman    |
|                      | Senior MD Coder                                     | Zhu-Ming Zhang     |
|                      | Programmer/Analyst                                  | Charles Campbell   |
|                      | Senior ECG Technician                               | Susan Hensley      |
|                      | Assistant Project Manager                           | Lisa Keasler       |

SUPPLEMENTARY DATA

**Supplementary Table S17.** Members of the SUMMIT consortium

| <b>Partner</b>           | <b>Name</b>           | <b>Position</b>                                                                        |
|--------------------------|-----------------------|----------------------------------------------------------------------------------------|
| 1                        | <b>Michael Mark</b>   | <b>Coordinator, WP6 leader</b>                                                         |
| Boehringer-Ingelheim     | Markus Albertini      | Project manager                                                                        |
| Ingelheim, Germany       | Carine Boustany       | Chronic Kidney Disease, Head of Lab                                                    |
|                          | Alexander Ehlgen      | Transmed                                                                               |
|                          | Martin Gerl           | Biomarker & Bioanalysis, Group leader                                                  |
|                          | Jochen Huber          | In vivo Scientist CMDR, Head of Lab                                                    |
|                          | Corinna Schölch       | Biomarker & Bioanalysis, Head of Lab                                                   |
|                          | Heike Zimdahl-Gelling | Pharmacogenomics, Head of Lab                                                          |
| 2                        | <b>Leif Groop</b>     | <b>Prof. Endocrinology; Coordinator Managing entity IMI-JU; PI; WP1 and WP6 leader</b> |
| Lund University          | Elisabet Agardh       | Prof. Ophthalmology                                                                    |
| Clinical Research Centre | Emma Ahlqvist         | Postdoc                                                                                |
| Malmö, Sweden            | Tord Ajanki           | Communication strategist                                                               |
|                          | Nibal Al Maghrabi     | Research nurse                                                                         |
|                          | Peter Almgren         | Biostatistician                                                                        |
|                          | Jan Apelqvist         | Diabetologist                                                                          |
|                          | Eva Bengtsson         | Assis. Prof. Cardiovascular research                                                   |
|                          | Lisa Berglund         | Postdoc                                                                                |
|                          | Harry Björckbacka     | Assis. Prof. Cardiovascular research                                                   |
|                          | Ulrika Blom-Nilsson   | LUDC administrator                                                                     |
|                          | Mattias Borell        | Website, server management                                                             |
|                          | Agneta Burström       | Research nurse                                                                         |
|                          | Corrado Cilio         | Assoc. Prof. Cellular autoimmunity                                                     |
|                          | Magnus Cinthio        | Assist. Prof. Electrical Measurements, Lund Technical University                       |
|                          | Karl Dreja            | Nephrologist                                                                           |
|                          | Pontus Dunér          | Postdoc Exp. Cardiovasc. Research                                                      |
|                          | Daniel Engelbertsen   | PhD student Exp. Cardiovasc. Research                                                  |
|                          | Joao Fadista          | Postdoc                                                                                |

SUPPLEMENTARY DATA

| Partner | Name                       | Position                                                       |
|---------|----------------------------|----------------------------------------------------------------|
|         | Maria Gomez                | Assoc. Prof. Cardiovascular disease, <b>WP4 co-leader</b>      |
|         | Isabel Goncalves           | Assis. Prof. Cardiovascular research                           |
|         | Bo Hedblad                 | Prof. Cardiovascular epidemiology                              |
|         | Anna Hultgårdh             | Prof. Vessel Wall Biology                                      |
|         | Martin E. Johansson        | Pathologist                                                    |
|         | Cecilia Kennbäck           | Laboratory Engineer                                            |
|         | Jasmina Kravic             | Database manager                                               |
|         | Claes Ladenvall            | Genetic statistician                                           |
|         | Åke Lernmark               | Prof. Type 1 diabetes and celiac disease                       |
|         | Eero Lindholm              | Physician, Researcher Diabetic Complications                   |
|         | Charlotte Ling             | Assist. Prof. Epigenetics                                      |
|         | Holger Luthman             | Prof. Medical genetics                                         |
|         | Olle Melander              | Assoc. Prof. Hypertension and cardiovascular disease           |
|         | Malin Neptin               | Biomedical analyst                                             |
|         | Jan Nilsson                | Prof. Experimental Cardiovascular research, <b>WP3 leader</b>  |
|         | Peter Nilsson              | Prof. Internal medicine                                        |
|         | Tobias Nilsson             | PhD student Electrical Measurements, Lund Technical University |
|         | Gunilla Nordin Fredriksson | Prof. Cardiovascular research                                  |
|         | Marju Orho-Melander        | Prof. Genetic epidemiology                                     |
|         | Emilia Ottoson-Laakso      | PhD student                                                    |
|         | Annie Persson              | Research nurse                                                 |
|         | Margaretha Persson         | Laboratory Engineer                                            |
|         | Mats-Åke Persson           | Database manager                                               |
|         | Jacqueline Postma          | Project manager                                                |
|         | Elisabeth Pranter          | Research nurse                                                 |
|         | Sara Rattik                | PhD student Exp. Cardiovasc. Research                          |
|         | Gunnar Sterner             | Chief physician Internal Medicine Research Unit                |
|         | Lilian Tindberg            | Research nurse                                                 |
|         | Maria Wigren               | Postdoc Exp. Cardiovasc. Research                              |
|         | Anna Zetterqvist           | PhD student                                                    |

SUPPLEMENTARY DATA

| Partner                | Name                   | Position                                                        |
|------------------------|------------------------|-----------------------------------------------------------------|
|                        | Mikael Åkerlund        | Postdoc                                                         |
|                        | Gerd Östling           | Laboratory Engineer                                             |
|                        |                        |                                                                 |
| 3                      | <b>Timo Kanninen</b>   | Technical director; PI                                          |
| Biocomputing Platforms | Anni Ahonen-Bishopp    | Software development manager                                    |
| (BC Platforms)         | Anita Eliasson         | Financial and administrative director                           |
| Espoo, Finland         | Timo Herrala           | System (server) specialist                                      |
|                        | Päivi Tikka-Kleemola   | Service manager                                                 |
|                        |                        |                                                                 |
| 4                      | <b>Anders Hamsten</b>  | Prof. Cardiovascular disease; Atherosclerosis Research Unit; PI |
| Karolinska Institute   | Christer Betsholtz     | Prof. Vascular biology                                          |
| Stockholm, Sweden      | Ami Björkholm          | Administrator                                                   |
|                        | Ulf de Faire           | Professor emeritus Cardiovascular epidemiology                  |
|                        | Fariba Foroogh         | Research engineer                                               |
|                        | Guillem Genové         | Scientist                                                       |
|                        | Karl Gertow            | Research Assist. Prof. Cardiovascular genetics                  |
|                        | Bruna Gigante          | Assoc. Professor Cardiovascular epidemiology                    |
|                        | Bing He                | Postdoc                                                         |
|                        | Karin Leander          | Assoc. Professor Cardiovascular epidemiology                    |
|                        | Olga McLeod            | Postdoc                                                         |
|                        | Maria Nastase-Mannila  | Postdoc                                                         |
|                        | Jaako Patrakka         | Postdoc                                                         |
|                        | Angela Silveira        | Assoc. Prof. Cardiovascular genetics                            |
|                        | Rona Strawbridge       | Postdoc                                                         |
|                        | Karl Tryggvason        | Prof. Medical Chemistry                                         |
|                        | Max Vikström           | Statistician                                                    |
|                        | John Öhrvik            | Professor                                                       |
|                        | Anne-May Österholm     | Postdoc                                                         |
|                        |                        |                                                                 |
| 5                      | <b>Barbara Thorand</b> | Nutritional scientist, epidemiologist                           |

SUPPLEMENTARY DATA

| Partner                   | Name                                       | Position                                                                  |
|---------------------------|--------------------------------------------|---------------------------------------------------------------------------|
| Helmholtz Centre          | Christian Gieger                           | Statistician                                                              |
| Munich, Germany           | Harald Grallert                            | Biologist                                                                 |
|                           | Tonia Ludwig                               | Statistician                                                              |
|                           | Barbara Nitz                               | Scientist                                                                 |
|                           | Andrea Schneider                           | Data manager                                                              |
|                           | Rui Wang-Sattler                           | Scientist                                                                 |
|                           | Astrid Zierer                              | Statistician                                                              |
|                           |                                            |                                                                           |
|                           | <b>6 Giuseppe Remuzzi</b>                  | Institute director; PI                                                    |
| Mario Negri Institute for | Ariela Benigni                             | Head of department Molecular Medicine                                     |
| Pharmacological Research  | Roberta Donadelli                          | Scientist                                                                 |
|                           | Maria Domenica Lesti                       | Researcher                                                                |
| Bergamo, Italy            | Marina Noris                               | Head Laboratory Immunology and genetics of transplanted and rare diseases |
|                           | Norberto Perico                            | Senior scientist                                                          |
|                           | Annalisa Perna                             | Biostatistician                                                           |
|                           | Rossella Piras                             | Postdoc                                                                   |
|                           | Piero Ruggerenti                           | Head of department Renal medicine, Assist. Prof. Nephrology and dialysis  |
|                           | Erica Rurali                               | Postdoc                                                                   |
|                           |                                            |                                                                           |
|                           | <b>7 David Dunger (att: Jane Horsford)</b> | Prof. Paediatrics; PI                                                     |
| University of Cambridge   | Ludo Chassin                               | Senior Data Manager                                                       |
| UK                        | Neil Dalton, London                        | Clinical biochemistry                                                     |
|                           | John Deanfield, London                     | Paediatric cardiology                                                     |
|                           | Jane Horsford                              | PA to Prof. Dunger                                                        |
|                           | Clare Rice                                 | Operations manager/financial contact                                      |
|                           | James Rudd                                 | Cardiovascular imaging                                                    |
|                           | Neil Walker                                | Head Data services                                                        |
|                           | Karen Whitehead                            | Technician                                                                |
|                           | Max Wong                                   | Postdoc                                                                   |

SUPPLEMENTARY DATA

| Partner                  | Name                   | Position                                                                                      |
|--------------------------|------------------------|-----------------------------------------------------------------------------------------------|
|                          |                        |                                                                                               |
|                          | 8 <b>Helen Colhoun</b> | Prof. Public health and epidemiology; PI; Vice coordinator Managing entity; <b>WP2 leader</b> |
|                          | Fiona Adams            |                                                                                               |
| University of Dundee     | Tahira Akbar           | PA to Helen Colhoun                                                                           |
| Scotland                 | Jill Belch             | Prof. Vasucular disease                                                                       |
|                          | Harshal Deshmukh       | PhD student                                                                                   |
|                          | Fiona Dove             |                                                                                               |
|                          | Angela Ellingford      | NHS Tayside Diabetic Retinopathy Screening Programme manager                                  |
|                          | Bassam Farran          | Statistician                                                                                  |
|                          | Mike Ferguson          | Dean of research Biological chemistry and drug discovery                                      |
|                          | Gary Henderson         |                                                                                               |
|                          | Graeme Houston         | Consultant radiologist/senior lecturer                                                        |
|                          | Faisel Khan            | Reader, Vascular & Inflammatory Diseases Research Unit                                        |
|                          | Graham Leese           | Consultant diabetologist/reader                                                               |
|                          | Yiyuan Liu             | PhD student                                                                                   |
|                          | Shona Livingstone      | Senior statistician                                                                           |
|                          | Helen Looker           | Epidemiologist                                                                                |
|                          | Margaret McCann        | Project assistant                                                                             |
|                          | Stuart McGurnaghan     | Lead data programmer                                                                          |
|                          | Andrew Morris          | Prof. Diabetic medicine                                                                       |
|                          | David Newton           |                                                                                               |
|                          | Colin Palmer           | Prof. Pharmacogenomics                                                                        |
|                          | Ewan Pearson           | Consultant diabetologist/senior lecturer                                                      |
|                          | Gillian Reekie         | Research Nurse                                                                                |
|                          | Natalie Smith          | Research Nurse                                                                                |
|                          |                        |                                                                                               |
|                          | 9 <b>Angela Shore</b>  | Prof. Cardiovascular Science, PI                                                              |
| Peninsula Medical School | Kuni Aizawa            | Postdoc                                                                                       |
| Exeter, UK               | Claire Ball            | Research nurse                                                                                |
|                          | Nick Bellenger         | Cardiologist                                                                                  |



SUPPLEMENTARY DATA

| Partner                                       | Name                    | Position                                         |
|-----------------------------------------------|-------------------------|--------------------------------------------------|
|                                               | Francesco Casanova      | Associate Research Fellow Vascular medicine      |
|                                               | Tim Frayling            | Prof. Genetics                                   |
|                                               | Phil Gates              | Senior lecturer Cardiovascular science           |
|                                               | Kim Gooding             | Postdoc Vascular medicine                        |
|                                               | Andrew Hattersley       | Prof. Molecular medicine                         |
|                                               | Roland Ling             | Consultant ophthalmologist                       |
|                                               | David Mawson            | Research technician                              |
|                                               | Robin Shandas           | Prof. Bioengineering (Colorado)                  |
|                                               | David Strain            | Stroke physician, clinical lecturer              |
|                                               | Clare Thorn             | Postdoc Vascular medicine                        |
|                                               |                         |                                                  |
| 10                                            | <b>Ulf Smith</b>        | Prof. ; PI                                       |
| University of Gothenburg                      | Ann Hammarstedt         | Researcher Molecular and clinical medicine       |
| Sweden                                        | Hans Häring             | Prof. University of Tübingen                     |
|                                               | Oluf Pedersen           | Prof. Steno Centre, Copenhagen                   |
|                                               | Georgio Sesti           | Prof. Universtiy of Catanzaro                    |
|                                               |                         |                                                  |
| 11                                            | <b>Per-Henrik Groop</b> | Prof. Diabetes genetics; PI                      |
|                                               | Emma Fagerholm          | PhD student, genetics                            |
| Folkhälsan                                    | Carol Forsblom          | Clinical coordinator                             |
| Helsinki, Finland                             | Valma Harjutsalo        |                                                  |
|                                               | Maikki Parkkonen        | Laboratory manager                               |
|                                               | Niina Sandholm          | DSc(PhD); GWAS and bioinformatics                |
|                                               | Nina Tolonen            | MD PhD                                           |
|                                               | Iiro Toppila            | BSc, bioinformatician                            |
|                                               | Erkka Valo              | MSc, bioinformatician                            |
|                                               |                         |                                                  |
| 12                                            | <b>Veikko Salomaa</b>   | Prof. Epidemiology; PI; <b>deputy leader WP2</b> |
| The National Institute for Health and Welfare | Aki Havulinna           | DSc. (tech), statistician                        |
| Helsinki, Finland                             | Kati Kristiansson       | Postdoc                                          |

SUPPLEMENTARY DATA

| Partner                       | Name                       | Position                                                                                                                                                      |
|-------------------------------|----------------------------|---------------------------------------------------------------------------------------------------------------------------------------------------------------|
|                               | Pia Okamo                  | THL press officer                                                                                                                                             |
|                               | Tomi Peltola               |                                                                                                                                                               |
|                               | Markus Perola              | Professor                                                                                                                                                     |
|                               | Arto Pietilä               | Statistician                                                                                                                                                  |
|                               | Samuli Ripatti             | Professor, Statistics                                                                                                                                         |
|                               | Marketta Taimi             | Research assistant                                                                                                                                            |
|                               |                            |                                                                                                                                                               |
| 13                            | <b>Seppo Ylä-Herttuala</b> | Prof.; PI; <b>WP4 leader</b>                                                                                                                                  |
| University of Eastern Finland | Mohan Babu                 | PhD student                                                                                                                                                   |
| Kuopio, Finland               | Marika Dijkstra            | PhD student                                                                                                                                                   |
|                               | Erika Gurzeler             | PhD student                                                                                                                                                   |
|                               | Jenni Huusko               | PhD student                                                                                                                                                   |
|                               | Ivana Kholová              | Postdoc                                                                                                                                                       |
|                               | Markku Laakso              | Prof.                                                                                                                                                         |
|                               | Mari Merentie              | PhD student                                                                                                                                                   |
|                               | Marja Poikolainen          | PA Prof Ylä-Herttuala                                                                                                                                         |
|                               |                            |                                                                                                                                                               |
| 14                            | <b>Mark McCarthy</b>       | Prof. Human type 2 diabetes; Oxford Centre for Diabetes, Endocrinology and Metabolism; Wellcome Trust Centre for Human Genetics; PI; <b>deputy leader WP1</b> |
| University of Oxford          | Chris Groves               | Technical staff                                                                                                                                               |
| UK                            | Thorhildur Juliusdottir    | PhD student                                                                                                                                                   |
|                               | Fredrik Karpe              | PI OCDEM                                                                                                                                                      |
|                               | Vasiliki Lagou             | Postdoc                                                                                                                                                       |
|                               | Andrew Morris              | Wellcome Trust Senior Fellow; Bioinformatics and statistical genetics                                                                                         |
|                               | Will Rayner                | Database manager                                                                                                                                              |
|                               | Neil Robertson             | Informatics                                                                                                                                                   |
|                               | Natalie van Zuydam         | Postdoc                                                                                                                                                       |
|                               |                            |                                                                                                                                                               |
| 15                            | <b>Claudio Cobelli</b>     | Prof. ; PI; <b>WP5 leader</b>                                                                                                                                 |
| University of Padova          | Barbara Di Camillo         | Assist. Prof.                                                                                                                                                 |

SUPPLEMENTARY DATA

| Partner                     | Name                     | Position                                                      |
|-----------------------------|--------------------------|---------------------------------------------------------------|
| Italy                       | Francesca Finotello      | PhD student                                                   |
| -                           | Francesco Sambo          | Postdoctoral fellow                                           |
| -                           | Gianna Toffolo           | Prof.                                                         |
| -                           | Emanuele Trifoglio       | PhD student                                                   |
| -                           | -                        | -                                                             |
| 16                          | <b>Riccardo Bellazzi</b> | Prof. Bioengineering; PI; <b>deputy leader WP5</b>            |
|                             | Nicola Barbarini         | Postdoctoral fellow                                           |
| University of Pavia         | Mauro Bucalo             | Software engineer                                             |
| Italy                       | Christiana Larizza       | Assist. Prof.                                                 |
|                             | Paolo Magni              | Assoc. Prof.                                                  |
|                             | Alberto Malovini         | Postdoctoral fellow                                           |
|                             | Simone Marini            | Postdoctoral fellow                                           |
|                             | Francesca Mulas          | Postdoctoral fellow                                           |
|                             | Silvana Quaglini         | Prof.                                                         |
|                             | Lucia Sacchi             | Assist. Prof.                                                 |
|                             | Francesca Vitali         |                                                               |
|                             |                          |                                                               |
| 17                          | <b>Ele Ferrannini</b>    | Prof. Medicine; PI                                            |
|                             | Beatrice Boldrini        | Postdoctoral fellow                                           |
| University of Pisa          | Michaela Kozakova        | Senior investigator Medical Pathophysiology                   |
| Italy                       | Andrea Mari              | Senior researcher Biomedical engineering (ISIB-CNR, Padova)   |
|                             | Carmela Morizzo          | Biologist, Sonographer Cardiovascular ultrasound              |
|                             | Lucrecia Mota            | EGIR administrative office                                    |
|                             | Andrea Natali            | Assoc. Prof. Medicine                                         |
|                             | Carlo Palombo            | Assoc. Prof. Medicine; <b>deputy leader WP3</b>               |
|                             | Elena Venturi            | Researcher                                                    |
|                             | Mark Walker              | Prof. Molecular diabetic medicine (Univ Newcastle-upon-Tyne ) |
|                             |                          |                                                               |
| 18                          | <b>Carlo Patrono</b>     | Prof. Pharmacology; PI                                        |
| Catholic University of Rome | Francesca Pagliaccia     | PhD student                                                   |

SUPPLEMENTARY DATA

| Partner                 | Name                          | Position                                                                                   |
|-------------------------|-------------------------------|--------------------------------------------------------------------------------------------|
| Italy                   | Bianca Rocca                  | Assist. Prof. Pharmacology                                                                 |
|                         |                               |                                                                                            |
| 19                      | <b>Pirjo Nuutila</b>          | Prof. ; PI                                                                                 |
| University of Turku     | Johanna Haukkala              | PhD student                                                                                |
| Finland                 | Juhani Knuuti                 | Prof. ; Director Turku PET Centre                                                          |
|                         | Anne Roivainen                | Prof.                                                                                      |
|                         | Antti Saraste                 | Adj. Prof.                                                                                 |
|                         |                               |                                                                                            |
| 20                      | <b>Paul McKeague</b>          | Prof. Genetic Epidemiology; PI                                                             |
| University of Edinburgh | Norma Brown                   | Research administrator, Public Health Services                                             |
| Scotland                | Marco Colombo                 | Bioinformaticist                                                                           |
|                         |                               |                                                                                            |
| 21                      | <b>Birgit Steckel-Hamann</b>  | Deputy coordinator; PI, Manager IMI, LRL                                                   |
| Eli Lilly               | Krister Bokvist               | Biostatistician                                                                            |
|                         | Sudha Shankar                 | Diabetologist                                                                              |
|                         | Melissa Thomas                | Translational Science                                                                      |
|                         |                               |                                                                                            |
| 22                      | <b>Li-ming Gan</b>            | Prof.; Translational Science Director Cardiovascular Disease; PI, <b>WP3 leader</b>        |
| AstraZeneca             | Suvi Heinonen                 | PhD, Internal AZ postdoc, Bioscience                                                       |
|                         | Ann-Cathrine Jönsson-Rylander | PhD, Assoc. Prof., Team Leader Bioscience, <b>WP4 leader</b>                               |
|                         | Remi Momo                     | Postdoctoral fellow                                                                        |
|                         | Volker Schneck                | Informatician Translational Science, <b>WP5 leader</b>                                     |
|                         | Robert Unwin                  | Translational Science Director Diabetic Nephropathy                                        |
|                         | Anna Walentinsson             | Geneticist Translational Science                                                           |
|                         | Carl Whatling                 | Bioscientist                                                                               |
|                         |                               |                                                                                            |
| 23                      | <b>Everson Nogoceke</b>       | Pre-clinical and clinical aspects of metabolic and vascular disease; PI; <b>WP2 leader</b> |
| Roche                   | Gonzalo Durán Pacheco         | Senior Research Statistician                                                               |
|                         | Ivan Formentini               | Biomarker & Experimental Medicine Leader                                                   |

SUPPLEMENTARY DATA

| Partner                | Name                  | Position                                                             |
|------------------------|-----------------------|----------------------------------------------------------------------|
|                        | Thomas Schindler      | Pre-clinical and clinical and clinical biomarkers                    |
|                        |                       |                                                                      |
| 24                     | <b>Piero Tortoli</b>  | Professor of Electronics                                             |
| University of Florence | Luca Bassi            | Postdoctoral fellow                                                  |
|                        | Enrico Boni           | Postdoctoral fellow                                                  |
|                        | Alessandro Dallai     | Postdoctoral fellow                                                  |
|                        | Francesco Guidi       | Technician                                                           |
|                        | Matteo Lenge          | PhD student                                                          |
|                        | Riccardo Matera       | PhD student                                                          |
|                        | Alessandro Ramalli    | PhD student                                                          |
|                        | Stefano Ricci         | Assist. Prof.                                                        |
|                        | Jacopo Viti           | PhD student                                                          |
|                        |                       |                                                                      |
| 25                     | <b>Bernd Jablonka</b> | SAD internal IMI coordinator                                         |
| Sanofi-aventis         | Dan Crowther          | Biomarker researcher                                                 |
|                        | Johan Gassenhuber     | Biostatistician                                                      |
|                        | Sibylle Hess          | Biomarker researcher                                                 |
|                        | Thomas Hübschle       | Pharmacologist Diabetes                                              |
|                        | Hans-Paul Juretschke  | Imaging                                                              |
|                        | Hartmut Rütten        | Head Translational Medicine                                          |
|                        | Thorsten Sadowski     | Pharmacologist Diabetes                                              |
|                        | Paulus Wohlfart       | Pharmacologist Diabetes                                              |
|                        |                       |                                                                      |
| 26                     | <b>Julia Brosnan</b>  | Biochemist, (pre)clinical research CVD, Pfizer US; <b>WP2 leader</b> |
| Pfizer                 | Valerie Clerin        | Cardio-renal biologist, WP2                                          |
|                        | Eric Fauman           | Computational biologist                                              |
|                        | Craig Hyde            | Statistician                                                         |
|                        | Anders Malarstig      | Human genetics, Pfizer Europe; <b>WP1 leader</b>                     |
|                        | Nick Pullen           | Renal Disease Research Director                                      |
|                        | Mera Tilley           |                                                                      |

SUPPLEMENTARY DATA

| <b>Partner</b> | <b>Name</b>     | <b>Position</b>                                      |
|----------------|-----------------|------------------------------------------------------|
|                | Theresa Tuthill | Imaging specialist                                   |
|                | Ciara Vangjeli  | Cardiovascular genetic epidemiologist, Pfizer Europe |
|                | Daniel Ziemek   | Computational biologist                              |

SUPPLEMENTARY DATA

**Supplementary Figure S1.** Histogram of estimated glomerular filtration rate in the Genetics of Diabetes and Audit Research in Tayside Scotland study (N=6,335) shows an approximately normal distribution.

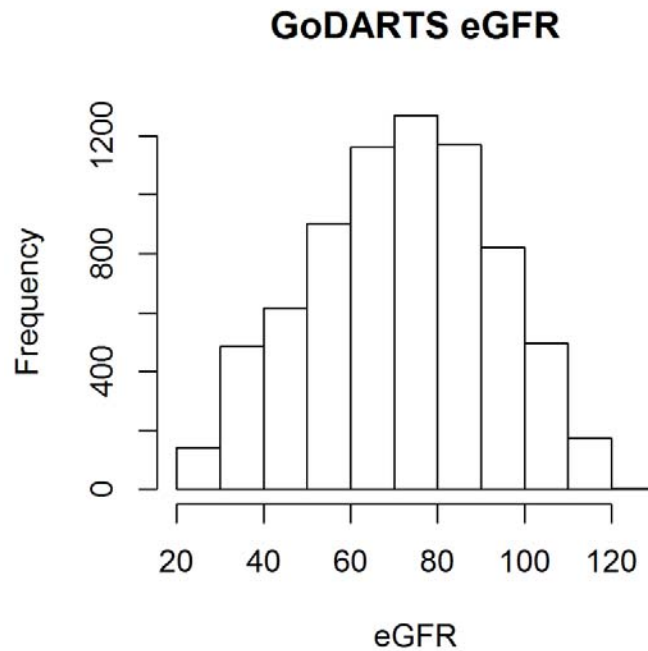

SUPPLEMENTARY DATA

**Supplementary Figure S2.** Power calculations were performed for a range of OR (1.05-2.00) and a range of minor allele frequencies (0.08-0.50) in A: 5,908 diabetic kidney disease cases (DKD) and 4,965 controls with no history of DKD with either T2D or T1D to detect an association with a candidate gene  $\alpha = 0.05/55 = 9 \times 10^{-4}$ ; B: 5,908 DKD and 4,965 controls with no history of DKD with either T2D or T1D to detect an association at  $\alpha = 5 \times 10^{-8}$  and C: 3,345 DKD cases and 2,372 controls with no history of DKD in subjects with T2D to detect associations at  $\alpha = 5 \times 10^{-8}$ .

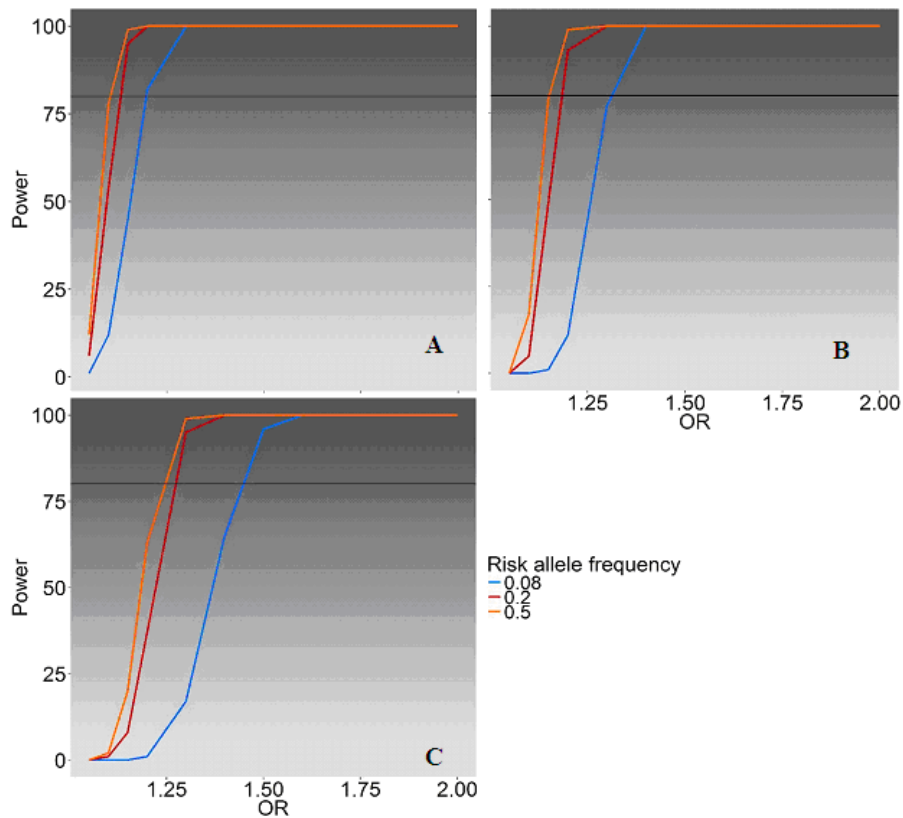



SUPPLEMENTARY DATA

**Supplementary Figure S3.** Manhattan and QQ plots of discovery p values for chronic kidney disease (CKD, plots A and B), CKD and diabetic kidney disease (DKD, plots C and D), ‘all DKD’ (plots E and F), end-stage renal disease compared to normoalbuminuric controls (ESRD, plots G and H), ESRD compared to normoalbuminuric controls and all other forms of DKD (plots J and K), ‘late DKD’ (plots L and M), microalbuminuria (plots N and P) and estimated glomerular filtration rate (plots Q and R) from the analysis of subjects with type 2 diabetes. Orange peaks represent signals selected for replication.

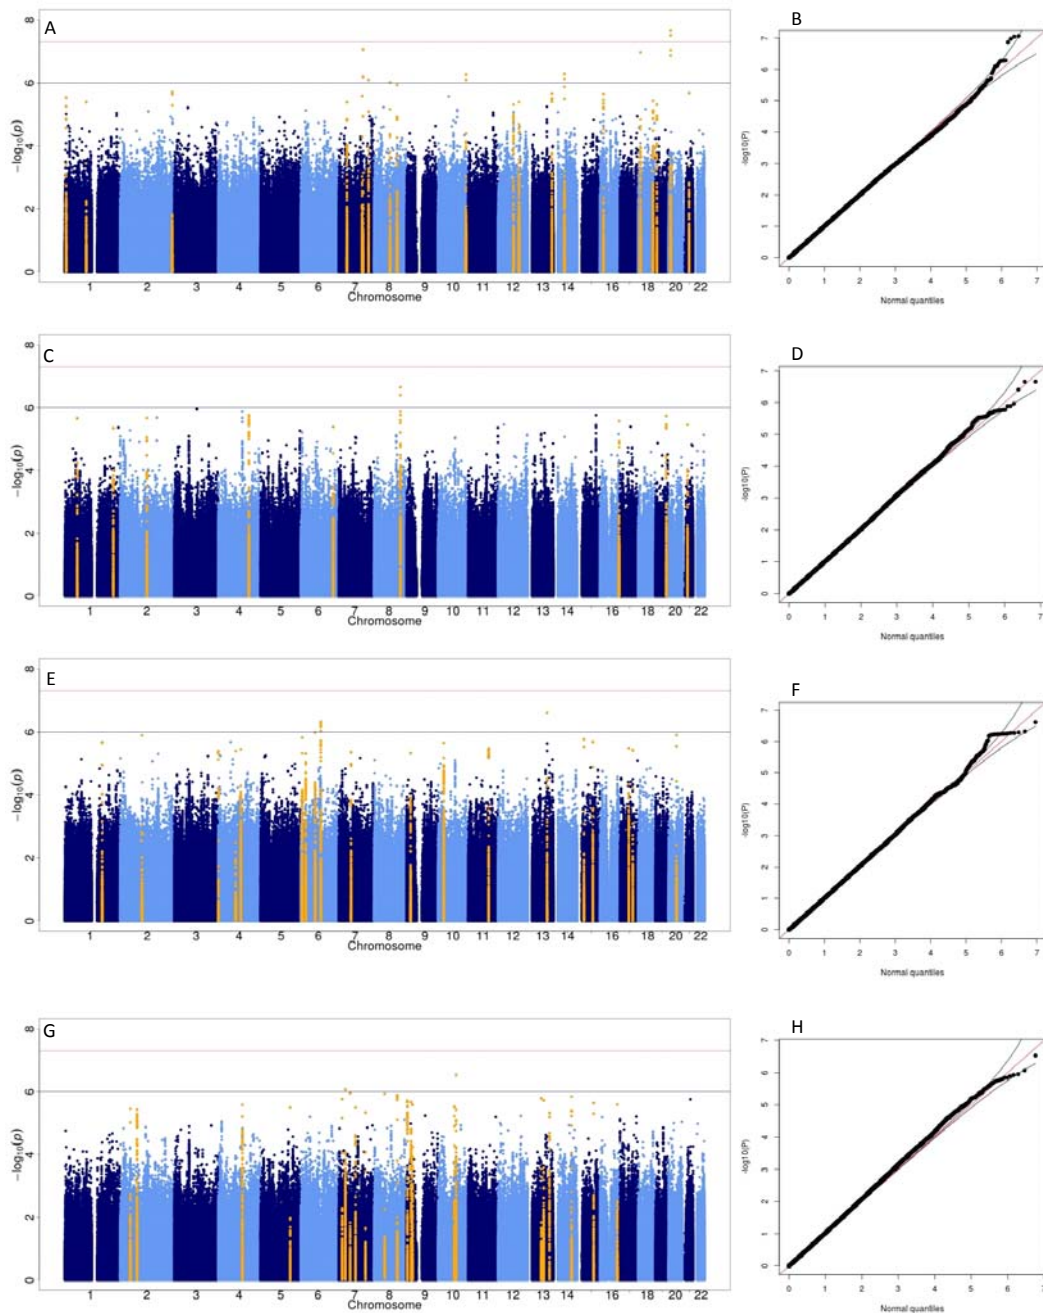

SUPPLEMENTARY DATA

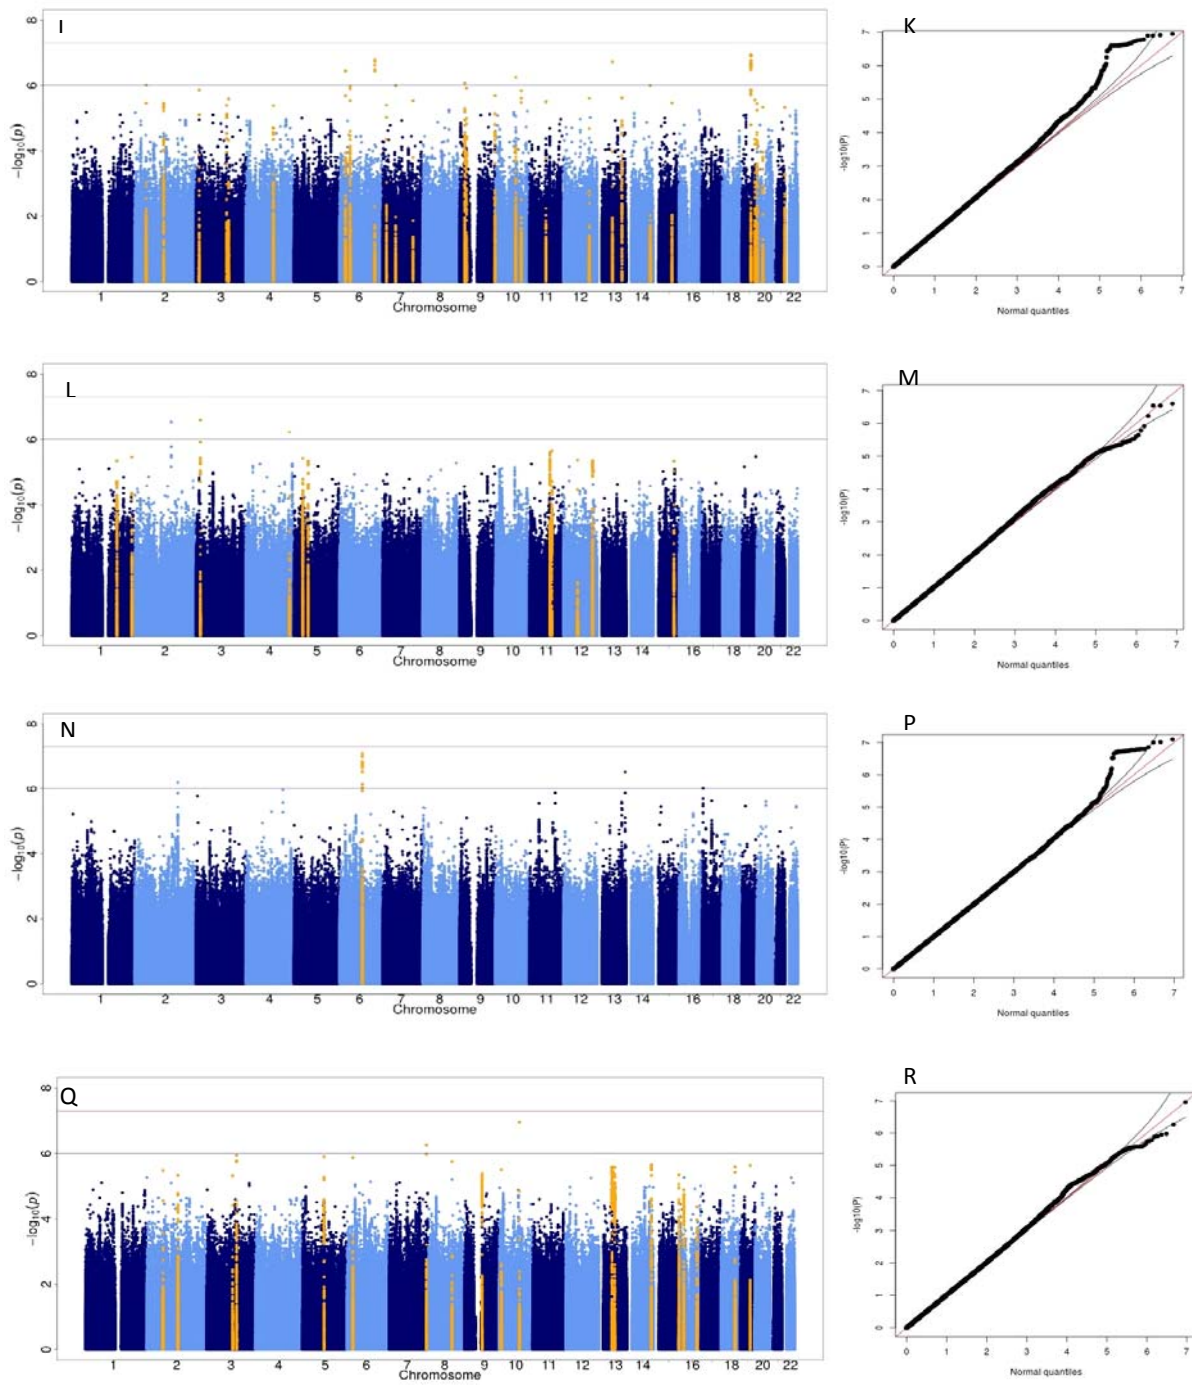

SUPPLEMENTARY DATA

**Supplementary Figure 4.** Manhattan and QQ plots for chronic kidney disease (CKD, plots A and B), CKD and diabetic kidney disease (DKD, plots C and D), ‘all DKD’ (plots E and F), end-stage renal disease compared to normoalbuminuric controls (ESRD, plots G and H), ESRD compared to normoalbuminuric controls and all other forms of DKD (plots J and K), ‘late DKD’ (plots L and M), microalbuminuria (plots N and P) and estimated glomerular filtration rate (plots Q and R) from the combined analysis of subjects with type 1 diabetes and type 2 diabetes. Orange peaks represent signals selected for replication.

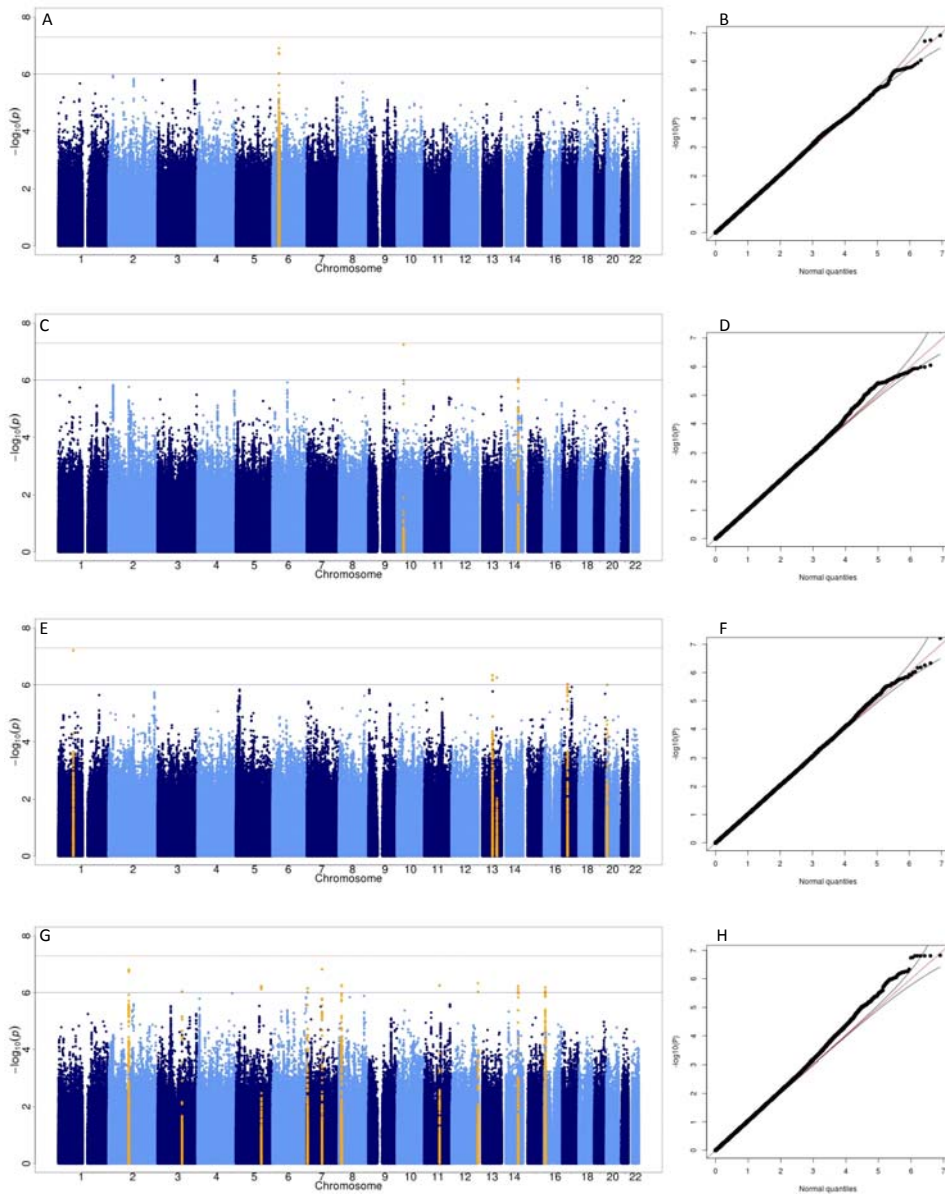

SUPPLEMENTARY DATA

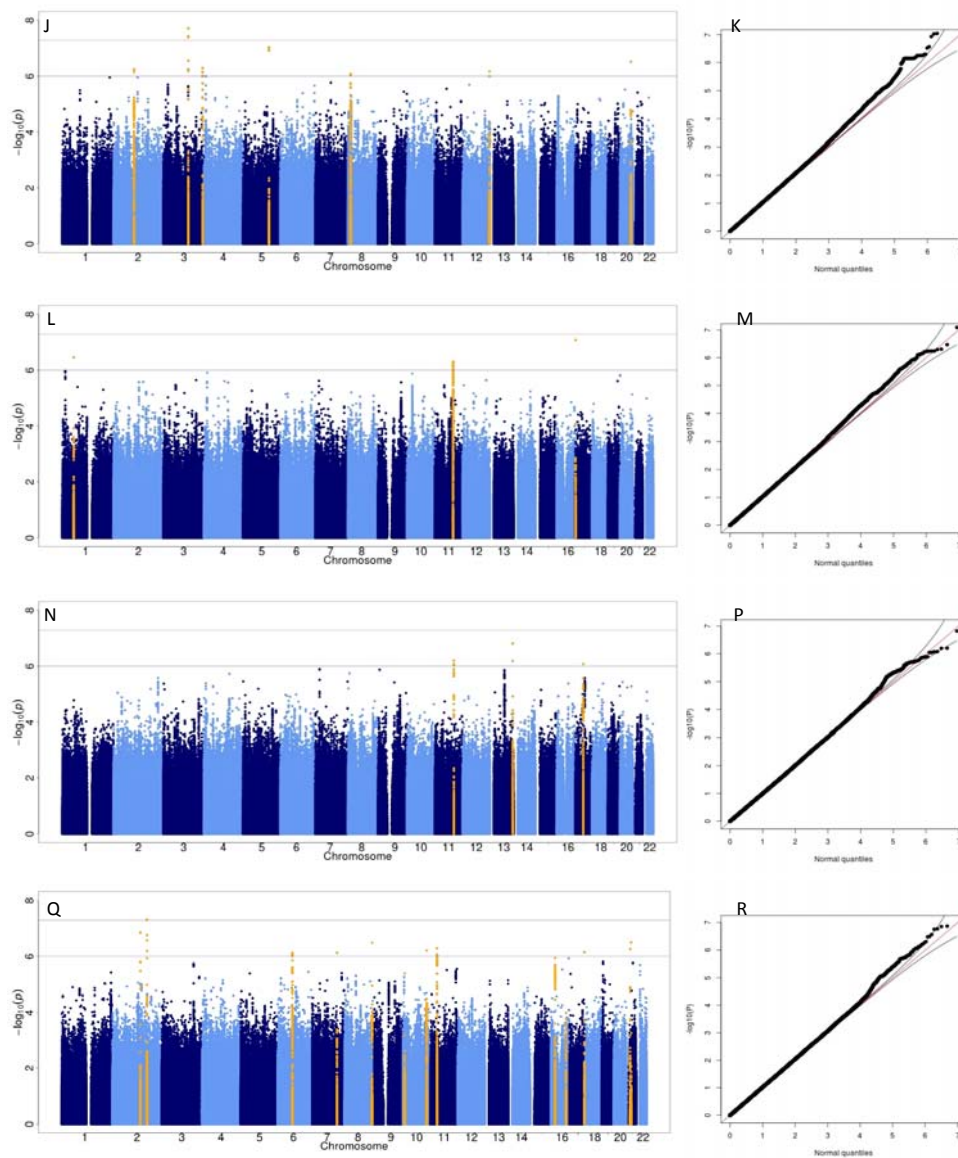

SUPPLEMENTARY DATA

**Supplementary Figure S5.** Two genome-wide significant ( $p < 5 \times 10^{-8}$ ) loci for eGFR from the combined analysis of subjects with either type 1 or type 2 diabetes. These loci map to two signals in *UMOD* and *PRKAG2* respectively (A and B). The Locuszoom plots show the locus specific association signal and the forest plots (C and D) the individual study effects or the top SNP.

**A**

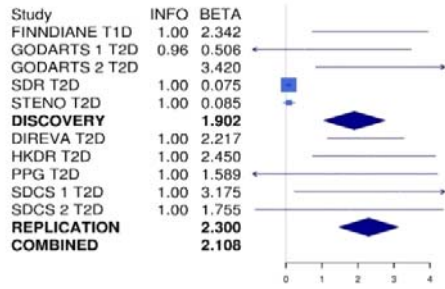

**B**

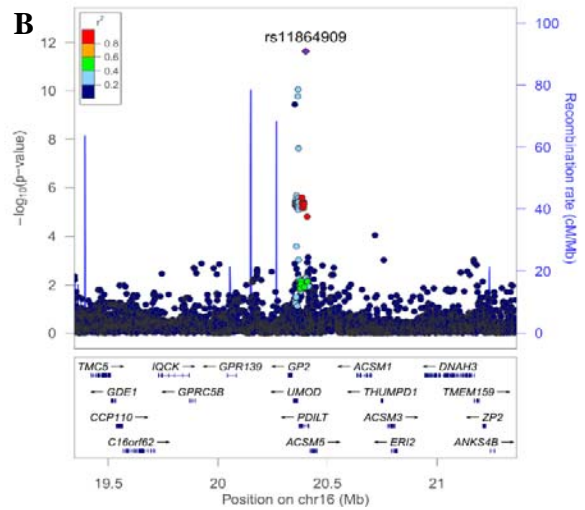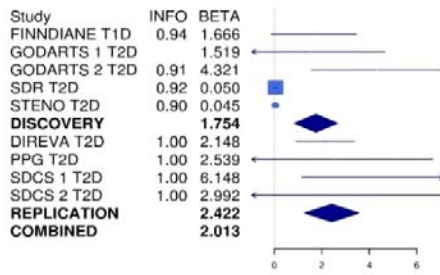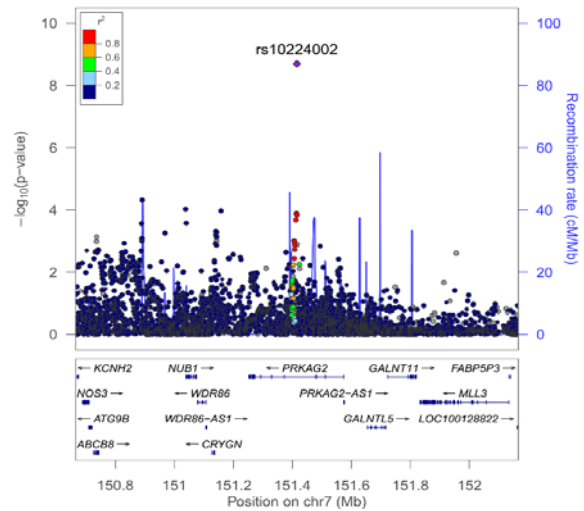

SUPPLEMENTARY DATA

**Supplementary Figure S6.** Sixty-one loci have been reported for diabetic kidney disease (DKD) in the literature. In this study we had summary statistics for 55 of these loci. The lattice plot shows the z score for the reported loci aligned to the risk or trait raising allele of the original report. The plot also reflects whether the original report was from subjects with diabetes (T1D+T2D, T1D or T2D) or irrespective of diabetes status (type of diabetes not indicated).

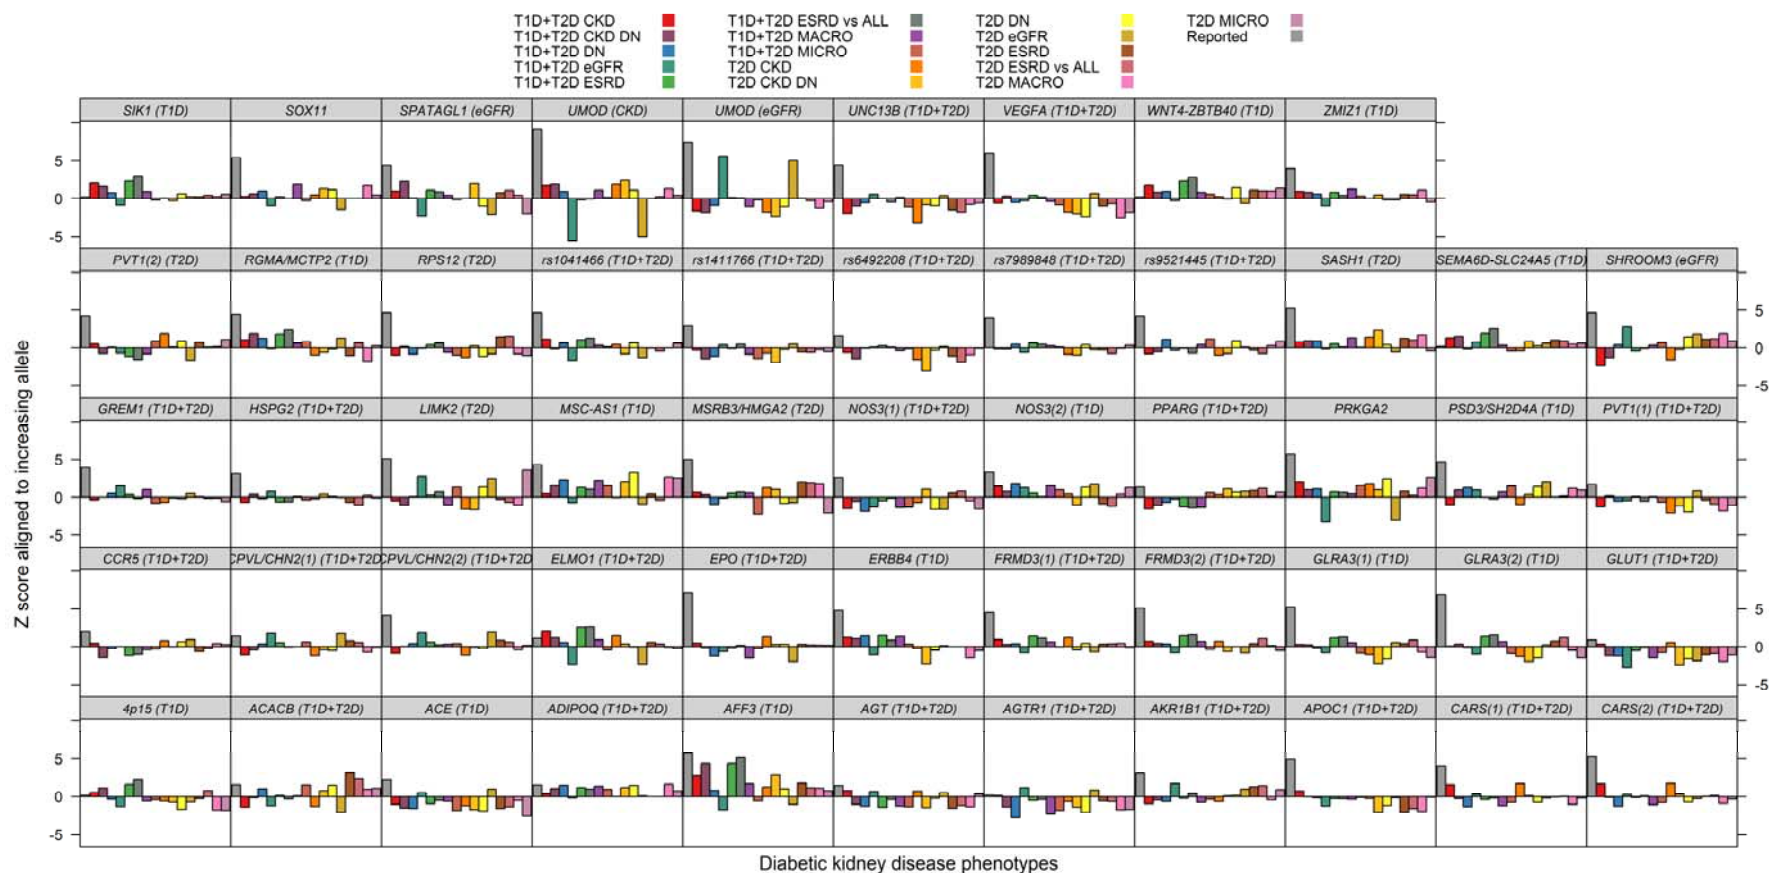

## SUPPLEMENTARY DATA

### *Acknowledgments*

The research was supported by the European Union's Seventh Framework Program (FP7/2007–2013) for the Innovative Medicine Initiative under grant agreement IMI/115006 (the SUMMIT consortium). N.R.v.Z was supported by DOLORisk (European Union's Horizon 2020 research and innovation programme grant No 633491) and the Tripartite Immunometabolism Consortium [TriC]- Novo Nordisk Foundation; Grant number NNF15CC0018486. EA was supported by Albert Pålsson Foundation and Diabetesfonden. N.S was funded through an EFSD award and a grant from the Academy of Finland (299200). M.A. was supported by a postgraduate doctoral scholarships from the Rhodes Trust and the Natural Sciences and Engineering Research Council of Canada. DIREVA is supported by the Vasa Hospital district, Turku University Hospital Research Funds and Heartfoundation of Jakobstad region. The Biobank Japan project was supported by the funding from the Ministry of Education, Culture, Sports, Sciences and Technology of Japanese government and the Japan Agency for Medical Research and Development. J.L. was supported by the Agency for Science & Technology and Research (A\*STAR) of Singapore. The project is supported by the Hong Kong Government Research Grant Committee and Innovation and Technology Grant Committee and The Chinese University of Hong Kong focused investment scheme. GENESIS & GENEDIAB studies were supported by grants from French ministry of health, SFD (Société Francophone du Diabète), ADRV Paris. The GWAS genotyping was supported by grants from the JDRF-I. This study was supported by the Swedish Research Council, the Swedish Heart and Lung Foundation, the Novo Nordisk Foundation, the Swedish Diabetes Foundation, and the Pålsson Foundation, Skåne University Hospital, Ernhold Lundström, and by equipment grants from the Knut and Alice Wallenberg Foundation, the Region Skåne, Skåne University Hospital, the Linneus Foundation for the Lund University Diabetes Center and the European Research Council (Consolidator grant nr 649021, Orho-Melander). D.R.W. was supported by an unrestricted grant from the Danish Diabetes Academy, which is funded by the Novo Nordisk Foundation. N.G. was supported by the Novo Nordisk Foundation Center for Basic Metabolic Research, an independent Research Center at the University of Copenhagen partially funded by an unrestricted donation from the Novo Nordisk Foundation ([www.metabol.ku.dk](http://www.metabol.ku.dk)). A.D.P. was supported by the JDRF (JDRF 17-2013-9). S.C.L. was supported by the Alexandra Health (Private Limited): SIGII/08005; SIGII/11001; SIG/11029; SIG/12024; SIG II/15205 and National Medical Research Council, Singapore: PPG/AH(KTPH)/2011; CIRG13nov045. R.C.W.M. acknowledges support from the Research Grants Council Theme-based Research Scheme (T12-402/13N), the Health and Medical Research Fund (01120796), The Focused Innovation Scheme, and VC One-off Discretionary Fund of the Chinese University of Hong Kong. Work from the Hong Kong Diabetes Registry was supported by the Hong Kong Foundation for Research and Development in Diabetes, the Liao Wun Yuk Memorial Fund, Research Grants Council Theme-based Research Scheme (T12-402/13N), the Chinese University of Hong Kong Focused Innovation Scheme, VC One-off Support Fund, and the Faculty Postdoctoral Fellowship Scheme. RIKEN is partially supported by a grant from the Leading Project of Ministry of Education, Culture, Sports, Science and Technology, Japan, and a grant from the program for promoting practical applications of genomic medicine, Japan Agency for Medical Research and Development. S.S.R. acknowledges the support of the JDRF (JDRF Grant 17-2012-542) in the genotyping and analysis as part of the JDRF Genetics of Nephropathy Collaborative project. J.C.F. was supported by JDRF grant 17-2013-7 and NIDDK R01 DK105154. D.D. acknowledges the support of the National Institute for Health Research (NIHR) Cambridge Biomedical Research Centre. GoDARTS: We are grateful to all the participants in this study, the general practitioners, the Scottish School of Primary Care for their help in recruiting the participants, and to the whole team, which includes interviewers, computer and laboratory technicians, clerical workers, research scientists, volunteers, managers, receptionists, and nurses. The study complies with the Declaration of Helsinki. We acknowledge the support of the Health Informatics Centre, University of Dundee for managing and supplying the anonymised data and NHS Tayside, the original data owner. The Wellcome Trust United Kingdom Type 2 Diabetes Case Control Collection (GoDARTS) was funded by

## SUPPLEMENTARY DATA

The Wellcome Trust (072960/Z/03/Z, 084726/Z/08/Z, 084727/Z/08/Z, 085475/Z/08/Z, 085475/B/08/Z) and as part of the EU IMI-SUMMIT program. The FinnDiane Study was supported by grants from the Folkhälsan Research Foundation, the Wilhelm and Else Stockmann Foundation, the Liv och Hälsa Foundation, Helsinki University Central Hospital Research Funds (EVO), the Signe and Ane Gyllenberg Foundation, Finska Läkaresällskapet, the Novo Nordisk Foundation (NNF14SA0003), and the Academy of Finland (134379 and 275614). We thank M. Parkkonen, A. Sandelin, A-R. Salonen, T. Soppela and J. Tuomikangas for skillful laboratory assistance in the FinnDiane study. We also thank all the subjects who participated in the FinnDiane study and gratefully acknowledge all the physicians and nurses at each centre involved in the recruitment of participants (S1 Table 14). L.C.G. acknowledges the support of Maria Sterner and Malin Neptin for GWAS genotyping efforts in SDR and the support of the Swedish Research Council, ERC-Adv res grant 269045-GENE TARGET T2D, Academy of Finland grantas 263401 and 267882, Sigrid Juselius Foundation. MIMcC is a Wellcome Trust Senior Investigator and an NIHR Senior Investigator Wellcome Trust 098381, 090532, 106310, NIH R01-MH101814 and JDRF 2-SRA-2014-276-Q-R.

### **Data availability**

The summary level GWAS is available at [www.imi-summit.eu](http://www.imi-summit.eu). Raw genotypic and phenotypic data will be made available for researchers who meet the criteria for access to confidential data for the following data: SDR: at [www.imi-summit.eu](http://www.imi-summit.eu); NFS-ORPS through JDRF/WT Diabetes and Inflammation Laboratory (DIL) in Cambridge (<https://www-gene.cimr.cam.ac.uk/>). The written consents of the FinnDiane, Eurodiab, GoDARTS and Steno studies do not allow sharing individual-level genotype or phenotype data (The authors of these studies may be contacted for collaboration: Per-Henrik Groop, [per-henrik.groop@helsinki.fi](mailto:per-henrik.groop@helsinki.fi); Helen Colhoun, [H.Colhoun@dundee.ac.uk](mailto:H.Colhoun@dundee.ac.uk), Peter Rossing, [pro@steno.dk](mailto:pro@steno.dk), respectively).

### **Collaborators**

S Koivula, T Uggeldahl, T Forslund, A Halonen, A Koistinen, P Koskiahho, M Laukkanen, J Saltevo, M Tiihonen, M Forsen, H Granlund, A C Jonsson, B Nyroos, P Kinnunen, A Orvola, T Salonen, A Vähänen, R Paldanius, M Riihelä, L Ryysy, H Laukkanen, P Nyländen, A Sademies, S Anderson, B Asplund, U Byskata, P Liedes, M Kuusela, T Virkkala, A Nikkola, E Ritola, M Niska, H Saarinen, E Oukko-Ruponen, T Virtanen, V A Lyytinen, H Kari, T Simonen, A Kaprio, J Kärkkäinen, B Rantaeskola, P Kääriäinen, J Haaga, A L Pietiläinen, S Klemetti, T Nyandoto, E Rontu, S Satuli-Autere, R Toivonen, H Virtanen, R Ahonen, M Ivaska-Suomela, A Jauhiainen, M Laine, T Pellonpää, R Puranen, A Airas, J Laakso, K Rautavaara, M Erola, E Jatkola, R Lönnblad, A Malm, J Mäkelä, E Rautamo, P Hentunen, J Lagerstam, M Feodoroff, D Gordin, O Heikkilä, K Hietala, J Fagerudd, M Korolainen, L Kyllönen, J Kytö, S Lindh, K Pettersson-Fernholm, M Rosengård-Bärlund, A Sandelin, L Thorn, J Tuomikangas, T Vesisenaho, J Wadén, V Sipilä, T Kalliomäki, J Koskelainen, R Nikkanen, N Savolainen, H Sulonen, E Valtonen, L Norvio, A Hämäläinen, E Toivanen, A Parta, I Pirttiniemi, S Aranko, S Ervasti, R Kauppinen-Mäkelin, A Kuusisto, T Leppälä, K Nikkilä, L Pekkonen, K Nuorva, S Jokelainen, K Kananen, M Karjalainen, P Kemppainen, A M Mankinen, A Reponen, M Sankari, H Stuckey, P Suominen, A Lappalainen, M Liimatainen, J Santaholma, A Aimolahti, E Huovinen, V Ilkka, M Lehtimäki, E Pälikkö-Kontinen, A Vanhanen, E Koskinen, T Siitonen, E Huttunen, R Ikäheimo, P Karhapää, P Kekäläinen, M Laakso, T Lakka, E Lampainen, L Moilanen, S Tanskanen, L Niskanen, U Tuovinen, I Vauhkonen, E Voutilainen, Yu Huang, Hui-yao Lan, Si Lok, Brian Tomlinson, Stephen K W Tsui, Weichuan Yu, Kevin Y L Yip, Ting Fung Chan, Xiaodan Fan, Nelson Tang, Xiaoyu Tian, Katie K H Chan, Fangying Xie, Alex C W Ng, Grace P Y Cheung, Ming-wai Yeung, Shi Mai, Sen Zhang, Pu Yu, Meng Weng, D A Savage, J Walker, S Thomas, G C Viberti, A JM Boulton, S Marshall, A G Demaine, B A Millward, S C Bain, Ville-Petteri Mäkinen”, Aila J Ahola, Emma



## SUPPLEMENTARY DATA

Dahlström, Markku Lehto, Raija Lithovius, Nicolae Mircea Panduru, Maija Parkkonen, Markku Saraheimo, Jenny Söderlund, Aino Soro-Paavonen, Anna Syreeni, Nina Tolonen, Gareth J McKay, Tamara Isakova, Cameron Palmer, Candace Guiducci, Andrew Taylor, Daniel B Mirel, Winfred W Williams, Eoin P Brennan, Denise M Sadlier, Finian Martin, Catherine Godson, Lynne Mayer, Patti Bourne, Mary Ellen Lackaye, Davida Kruger, J Kimberly Jones, Ellen Golden, Mary Larkin, Georgia Ziegler, Susan Caulder, Clare Pittman, Mary Johnson, Kimberly Gunyou, Brenda Vittetoe, Nancy Flaherty, Susan Hitt, Lori Cimino, Christine Wigley, Suzanne Strowig, Annette Barnie, Robyn Fahlstrom, Judith Harth, Marsha Driscoll, Janie Lipps Hagan, Lucy Levandoski, Patricia Gatcomb, Daphne Adelman, Susan Colson, Gayle Lorenzi, Sherry Johnsonbaugh, Janene Canady, Maria Luisa Bernal, Catherine Martin, David Nathan, Catherine Cowie, Ellen Leschek, Patricia Cleary, John Lachin, Bernie Zinman, Rose Gubitosi-Klug, Barbara Braffett, Mike Steffes, Valerie Arends, Barbara Blodi, Ronald Danis, Daniel Lawrence, Hugh Wabers, Elsayed Soliman, Zhu-Ming Zhang, Charles Campbell, Susan Hensley, Lisa Keasler, Mark Schutta, Naina Sinha Gregory, Arti Bhan, Lloyd Aiello, John Service, Louis Luttrell, Maria Lopes-Virella, Richard Bergenstal, William Sivitz, John Bantle, David Goldstein, Dean Hainsworth, Trevor Orchard, Samuel Dagogo-Jack, Philip Raskin, Jerry Palmer, Charlotte McDonald, Michael May, Neil White, William Tamborlane, Mark Molitch, Sunder Mudaliar, Ryan Miller, David Schade, John Malone, Anthony Morrison, William Herman, Rodica Pop-Busui, Michael Mark, Markus Albertini, Carine Boustany, Alexander Ehlgen, Martin Gerl, Jochen Huber, Corinna Schölch, Heike Zimdahl-Gelling, Elisabet Agardh, Tord Ajanki, Nibal Al Maghrabi, Jan Apelqvist, Eva Bengtsson, Lisa Berglund, Harry Björckbacka, Ulrika Blom-Nilsson, Mattias Borell, Agneta Burström, Corrado Cilio, Magnus Cinthio, Karl Dreja, Pontus Dunér, Daniel Engelbertsen, Joao Fadista, Maria Gomez, Isabel Goncalves, Bo Hedblad, Anna Hultgårdh, Martin E Johansson, Cecilia Kennbäck, Jasmina Kravic, Åke Lernmark, Eero Lindholm, Charlotte Ling, Holger Luthman, Malin Neptin, Jan Nilsson, Peter Nilsson, Tobias Nilsson, Gunilla Nordin Fredriksson, Emilia Ottoson-Laakso, Annie Persson, Margaretha Persson, Mats-Åke Persson, Jacqueline Postma, Elisabeth Pranter, Sara Rattik, Gunnar Sterner, Lilian Tindberg, Maria Wigren, Anna Zetterqvist, Mikael Åkerlund, Gerd Östling, Timo Kanninen, Anni Ahonen-Bishopp, Anita Eliasson, Timo Herrala, Päivi Tikka-Kleemola, Anders Hamsten, Christer Betsholtz, Ami Björckholm, Ulf de Faire, Fariba Foroogh, Guillem Genové, Karl Gertow, Bruna Gigante, Bing He, Karin Leander, Olga McLeod, Maria Nastase-Mannila, Jaako Patrakka, Angela Silveira, Rona Strawbridge, Karl Tryggvason, Max Vikström, John Öhrvik, Anne-May Österholm, Barbara Thorand, Christian Gieger, Harald Grallert, Tonia Ludwig, Barbara Nitz, Andrea Schneider, Rui Wang-Sattler, Astrid Zierer, Ariela Benigni, Roberta Donadelli, Maria Domenica Lesti, Marina Noris, Annalisa Perna, Rossella Piras, Piero Ruggenenti, Ludo Chassin, Neil Dalton, John Deanfield, Jane Horsford, Clare Rice, James Rudd, Neil Walker, Karen Whitehead, Max Wong, Fiona Adams, Tahira Akbar, Jill Belch, Fiona Dove, Angela Ellingford, Bassam Farran, Mike Ferguson, Gary Henderson, Graeme Houston, Faisal Khan, Graham Leese, Yiyuan Liu, Shona Livingstone, Helen Looker, Margaret McCann, Stuart McGurnaghan, Andrew Morris, David Newton, Ewan Pearson, Gillian Reekie, Natalie Smith, Angela Shore, Kuni Aizawa, Claire Ball, Nick Bellenger, Francesco Casanova, Tim Frayling, Phil Gates, Kim Gooding, Andrew Hattersley, Roland Ling, David Mawson, Robin Shandas, David Strain, Clare Thorn, Ulf Smith, Ann Hammarstedt, Hans Häring, Georgio Sesti, Emma Fagerholm, Iiro Toppila, Veikko Salomaa, Aki Havulinna, Kati Kristiansson, Pia Okamo, Tomi Peltola, Markus Perola, Arto Pietilä, Samuli Ripatti, Marketta Taimi, Seppo Ylä-Herttua, Mohan Babu, Marike Dijkstra, Erika Gurzeler, Jenni Huusko, Ivana Kholová, Mari Merentie, Marja Poikolainen, Chris Groves, Thorhildur Juliusdottir, Fredrik Karpe, Vasiliki Lagou, Claudio Cobelli, Barbara Di Camillo, Francesca Finotello, Francesco Sambo, Gianna Toffolo, Emanuele Trifoglio, Riccardo Bellazzi, Nicola Barbarini, Mauro Bucalo, Christiana Larizza, Paolo Magni, Alberto Malovini, Simone Marini, Francesca Mulas, Silvana Quaglini, Lucia Sacchi, Francesca Vitali, Ele Ferrannini, Beatrice Boldrini, Michaela Kozakova, Andrea Mari, Carmela Morizzo, Lucrecia Mota, Andrea Natali, Carlo Palombo, Elena Venturi, Mark Walker, Carlo Patrono, Francesca Pagliaccia, Bianca Rocca, Pirjo Nuutila, Johanna Haukkala, Juhani Knuuti, Anne

## SUPPLEMENTARY DATA

Roivainen, Antti Saraste, Norma Brown, Marco Colombo, Birgit Steckel-Hamann, Krister Bokvist, Sudha Shankar, Melissa Thomas, Li-ming Gan, Suvi Heinonen, Ann-Cathrine Jönsson-Rylander, Remi Momo, Volker Schnecke, Robert Unwin, Anna Walentinsson, Carl Whatling, Everson Nogoceke, Gonzalo Durán Pacheco, Ivan Formentini, Thomas Schindler, Piero Tortoli, Luca Bassi, Enrico Boni, Alessandro Dallai, Francesco Guidi, Matteo Lenge, Riccardo Matera, Alessandro Ramalli, Stefano Ricci, Jacopo Viti, Bernd Jablonka, Dan Crowther, Johan Gassenhuber, Sibylle Hess, Thomas Hübschle, Hans-Paul Juretschke, Hartmut Rütten, Thorsten Sadowski, Paulus Wohlfart, Valerie Clerin, Craig Hyde, Anders Malarstig, Nick Pullen, Mera Tilley, Theresa Tuthill, Ciara Vangjeli
